# Supplementary material for: Disclosure of payments by pharmaceutical companies to healthcare professionals in the UK: analysis of the Association of the British Pharmaceutical Industry’s Disclosure UK database, 2015 and 2016 cohorts
Source: PubMed Central journal article supplement — BMJ Open. 2018 Oct 21;8(10):e023094. doi: 10.1136/bmjopen-2018-023094 (PMC6196800; doi:10.1136/bmjopen-2018-023094), 2018-10-21
Supplement: bmjopen-2018-023094.draft_revisions.pdf [file bmjopen-2018-023094.draft_revisions.pdf]

# BMJ Open

BMJ Open is committed to open peer review. As part of this commitment we make the peer review history of every article we publish publicly available.

When an article is published we post the peer reviewers' comments and the authors' responses online. We also post the versions of the paper that were used during peer review. These are the versions that the peer review comments apply to.

The versions of the paper that follow are the versions that were submitted during the peer review process. They are not the versions of record or the final published versions. They should not be cited or distributed as the published version of this manuscript.

BMJ Open is an open access journal and the full, final, typeset and author-corrected version of record of the manuscript is available on our site with no access controls, subscription charges or pay-per-view fees (<http://bmjopen.bmj.com>).

If you have any questions on BMJ Open's open peer review process please email [info.bmjopen@bmj.com](mailto:info.bmjopen@bmj.com)

# BMJ Open

**Disclosure of payments by pharmaceutical companies to healthcare professionals in the United Kingdom: analysis of the Association of the British Pharmaceutical Industry's Disclosure UK database, 2015 and 2016 cohorts**

|                               |                                                                                                          |
|-------------------------------|----------------------------------------------------------------------------------------------------------|
| Journal:                      | <i>BMJ Open</i>                                                                                          |
| Manuscript ID                 | bmjopen-2018-023094                                                                                      |
| Article Type:                 | Research                                                                                                 |
| Date Submitted by the Author: | 20-Mar-2018                                                                                              |
| Complete List of Authors:     | Mulinari, Shai; Lunds Universitet, Sociology<br>Ozieranski, Piotr; University of Bath                    |
| Keywords:                     | Transparency, Pharmaceutical Industry, Conflict of Interest, Disclosure, United Kingdom, Self-regulation |
|                               |                                                                                                          |

SCHOLARONE™  
Manuscripts

Peer Review Only

1  
2  
3 **Disclosure of payments by pharmaceutical companies to healthcare professionals in the**  
4 **United Kingdom: analysis of the Association of the British Pharmaceutical Industry's**  
5 **Disclosure UK database, 2015 and 2016 cohorts**  
6  
7

8  
9 **Authors:** Shai Mulinari<sup>1\*</sup>, Piotr Ozieranski<sup>2</sup>  
10

11  
12  
13 <sup>1</sup> Department of Sociology, Faculty of Social Sciences, Lund University, Sweden  
14

15 <sup>2</sup> Department of Social and Policy Sciences, University of Bath, Bath, UK  
16  
17

18  
19 **\*To whom correspondence should be addressed:**  
20

21 Department of Sociology, Lund University, Sweden  
22

23 Box 117, 221 00 Lund, Sweden  
24

25  
26 E-mail: [shai.mulinari@soc.lu.se](mailto:shai.mulinari@soc.lu.se) (preferred for communication)  
27

28 Phone: +46462223466 (work); +46737343316 (cellphone)  
29  
30

31  
32 **Word count:** 5014  
33  
34  
35  
36  
37  
38  
39  
40  
41  
42  
43  
44  
45  
46  
47  
48  
49  
50  
51  
52  
53  
54  
55  
56  
57  
58  
59  
60

## Abstract

**Objectives:** To analyse the section of Disclosure UK that pertains to healthcare professionals (HCPs) in order to provide insight into the database's structure and content and suggest ways to improve its transparency.

**Design and Participants:** Cohort study involving drug companies and HCPs in the 2015 and 2016 versions of Disclosure UK.

**Results:** Companies report transfers of value (TOVs) to named HCPs or, where an HCP declines to consent, in aggregate. Only a limited number of variables describe the recipient HCP and the TOV, precluding refined analyses. In 2015, 107 companies reported 54,910 TOVs worth £50,967,728. In 2016, 109 companies reported TOVs but spending decreased by 7.3%. The spending was concentrated: the top-10 spenders reported about 50% of the total value, with consultancy-related payments comprising over 70%, and the rest being costs for events. In 2015, 55.5% (30,478) of TOVs worth £24,428,619 (47.9%) were disclosed at the individual level (i.e., to named HCPs), increasing to 64.5% (32,407) and £28,145,091 (59.2%) in 2016. We found evidence of concealment of larger-size consultancy-related payments in both years. Despite increased individual-level disclosure in 2016, the median number of TOVs disclosed by each company at the individual level was only 57.7%, with 25% of companies disclosing less than 38.6%. We found little agreement (62%-48% in 2015 and 46%-30% in 2016) between disclosure rates that we calculated based on information in the database and those provided by companies.

## Conclusions

Disclosure UK represents a step towards enhanced transparency but deficiencies undercut its usefulness. Key deficiencies include: few variables describing payment recipients, a relatively low individual-level disclosure rate, variation in individual-level disclosure rates across companies and payment types, and reporting ambiguities or inconsistencies. We make recommendations on how to improve transparency, including using an easily interpretable disclosure rate statistic that allows for comparison across years, firms, and countries.

## Article summary

### *Strengths and limitations of this study*

- To the best of our knowledge, Disclosure UK has hitherto eluded in-depth analysis; indeed, we are not aware of studies analysing publically available pharmaceutical industry disclosure databases in any European country.
- Our analysis was based on the full dataset for two years.
- Our calculations of overall payment sums and individual-level disclosure rates are consistent with what was reported by the Association of the British Pharmaceutical Industry, which corroborates our methodology.
- A limitation is that we had no way of checking the accuracy of the data reported by companies.
- Our study does not consider differences in companies' approaches to interpreting and reporting of some data elements and which can invalidate direct comparison of the value of payments between companies.

**Keywords:** Transparency, Pharmaceutical Industry, Conflict of Interest, Disclosure, United Kingdom, Self-regulation

## Introduction

Governments in many countries encourage collaborations between pharmaceutical companies and healthcare professionals (HCPs) to boost innovation and efficiency in healthcare. However, there is a recognised risk that HCPs' commercial links create conflicts of interest<sup>1</sup> that may bias medical research,<sup>2</sup> treatment decisions<sup>3</sup> and lead to wasteful public spending.<sup>4</sup> In recent years, a key way of addressing these concerns<sup>5</sup> – and also of protecting healthcare stakeholders' reputation for transparency and public accountability<sup>6</sup> – is by enhancing the transparency in the industry's financial support to HCPs<sup>7</sup>. The probably most recognised transparency initiative in this area is the US Government's Physician Payment "Sunshine Act", requiring pharmaceutical and medical device companies to report payments to named doctors and teaching hospitals in a public database.<sup>5</sup> Similarly, a few European countries have enacted transparency acts, e.g., France, Portugal and Latvia.<sup>7</sup> Yet most European countries have preferred relying on industry self-regulation, rather than legislative approaches, based on the European Federation of Pharmaceutical Industries and Associations' (EFPIA's) guidelines requiring companies to disclose payments or benefits in kind – also known as transfers of value (TOVs) – made to HCPs and healthcare organisations.<sup>8</sup>

Accordingly, following the UK's experience with pharmaceutical industry self-regulation,<sup>9 10</sup> the Association of the British Pharmaceutical Industry (ABPI) implemented the EFPIA guidelines in 2016 by establishing Disclosure UK, a public and yearly-updated industry payments database. In this paper, we analyse the part of Disclosure UK that pertains to HCPs. This includes payments for events registrations and travel and accommodation; and fees and expenses for consultancy and services. While the launch of the database received considerable attention and commentary,<sup>11-14</sup> it has so far eluded in-depth scrutiny. One key issue of concern has been that, unlike the legislative approaches obliging disclosure, the self-regulatory approach has an "opt-out" clause whereby HCPs can choose not to have their name reported due to data protection regulations. Preliminary analysis conducted on behalf of the ABPI indicated that this option allowed only 55% of TOVs made in 2015 to be linked to named HCPs,<sup>15</sup> increasing to 65% in 2016.<sup>16</sup> This preliminary analysis did not consider, however, differences in companies' ability to secure consent even though information on cross-company differences in disclosure rates might offer clues on how to enhance transparency, for example by pointing to good or bad practices. Neither did this analysis examine differences in individual-level disclosure rates across TOV types (e.g., events registration fees vs.

1  
2  
3 consultancy fees) even though information on such differences might shed light on reasons  
4 for non-disclosure.  
5

6  
7 Whether disclosure initiatives can or cannot deliver transparency also depends on the  
8 accessibility and analysability of the released data. From this perspective, a limitation in the  
9 self-regulatory approach is the lack of EFPIA provisions mandating national industry trade  
10 groups to make the data available in a downloadable, searchable and analysable format.<sup>7</sup>  
11 However, this limitation does not apply to the UK, where the ABPI has created the  
12 downloadable and relatively user-friendly Disclosure UK database. Yet, despite being at the  
13 frontline of pharmaceutical industry payment disclosures in Europe, the Disclosure UK  
14 initiative may not live up to the high expectations stakeholders associate with it.<sup>17</sup> Notably,  
15 early analyses indicate that not only do many HCPs decline individual-level disclosure,<sup>11 12</sup>  
16 but also that there are discrepancies across companies in how they record and report some  
17 data.<sup>15</sup> Thus, in conjunction with the release of the first Disclosure UK database in June 2016,  
18 the ABPI announced an estimated 70% individual-level disclosure rate for HCPs, but six  
19 months later the ABPI revised this figure to 55% after having identified differences between  
20 companies in how they recorded disclosure rates.<sup>15</sup> Apart from demonstrating complexities in  
21 interpreting disclosure data, this episode – including the fact the major inaccuracies in a key  
22 statistic was not identified by any outside analysts but had to be internally discovered six  
23 months later – underscores the need for in-depth, independent analyses of Disclosure UK,  
24 corresponding with the growing body of research on US data released under the provisions of  
25 the “Sunshine Act”.<sup>3 18-24</sup>  
26  
27  
28  
29  
30  
31  
32  
33  
34  
35  
36  
37  
38  
39

40 The aim of this paper is, therefore, to carry out an assessment of Disclosure UK that goes  
41 beyond the preliminary analyses and commentary, and which can help establish a more  
42 comprehensive picture of the information in the database and suggests ways to improve its  
43 transparency. To this end, we sought to (1) describe the structure of Disclosure UK, including  
44 the kind of information and variables available as compared to the US “Sunshine Act”  
45 database; (2) calculate key statistics, e.g., number and value of payments and individual-level  
46 disclosure rates; and (3) explore the variation across companies in spending and disclosure  
47 rates, as well as possible ambiguities and inconsistencies in the way companies report this  
48 information.  
49  
50  
51  
52  
53  
54  
55  
56  
57  
58  
59  
60

1  
2  
3 For all purposes, we analysed the 2015 and 2016 database versions that were accessible in  
4 July 2017. Although our analysis is restricted to the UK our findings have implications for the  
5 interpretation of disclosure data in other countries too, especially in European countries that  
6 have adopted the self-regulatory model but where analysis is more cumbersome, if not  
7 impossible, given the limited data accessibility in the absence of centralised payment  
8 databases.<sup>7</sup>  
9  
10  
11  
12  
13  
14

## 15 **Methods**

### 18 *Disclosure UK database*

19  
20 Companies report TOVs on a yearly basis in Disclosure UK. Data for 2015 was released in  
21 June 2016, and the 2016 data was released in June 2017. During the course of our study we  
22 realised that the databases were occasionally updated with some new information without  
23 notice. We decided to work with the databases downloaded in July 2017 to ensure  
24 comparability with results published on behalf of the ABPI.<sup>15 16</sup> From the 2015 database we  
25 excluded payments reported by Sigma-Tau because Baxalta also reported these same  
26 payments due to its acquisition of Sigma-Tau Pharma Ltd.<sup>25</sup> In the 2015 and 2016 databases  
27 we identified one and three payment sums registered with negative signs, respectively, that  
28 we changed to positive signs, assuming these were typos.  
29  
30  
31  
32  
33  
34  
35

### 36 *Structure of Disclosure UK*

37  
38 We used a qualitative, inductive and comparative methodology to characterise Disclosure  
39 UK. We sought to identify the key elements in the database, such as the various variables  
40 describing TOVs and HCPs, by, first, running a number of simple analyses to familiarise  
41 ourselves with the databases and, second, by comparing and contrasting key elements in  
42 Disclosure UK with the US “Sunshine Act” Open Payments database. We also reviewed, and  
43 extracted definitions from, the EFPIA Disclosure code,<sup>8</sup> the ABPI Code of Practice,<sup>26</sup> and the  
44 Disclosure Template that companies use when reporting payments.<sup>27</sup>  
45  
46  
47  
48  
49  
50

### 51 *TOV numbers, monetary value and individual-level disclosure rates*

52  
53 Companies report TOVs to named HCPs or, where an HCP does not grant consent, in  
54 aggregate. Each TOV entry in the database can represent several payments to the same  
55 recipient for a certain TOV *type* (registration fees, consultancy fees etc.) that have been  
56  
57  
58  
59  
60



1  
2  
3 totalled by the paying company.<sup>27</sup> For the payments disclosed in aggregate, companies report  
4 the number and aggregate monetary value of the TOVs by their type. We computed the total  
5 numbers of TOVs, as well as the numbers per TOV type, by, first, tallying the number of  
6 TOVs disclosed on the individual level, and then adding the number of TOVs disclosed in  
7 aggregate. We used the same strategy to compute the total monetary value of TOVs as well as  
8 value per TOV type.  
9  
10  
11  
12  
13

14 Based on this information we also easily obtained the overall individual-level disclosure rate  
15 across all TOV types and the rates per TOV type (e.g., consultancy fees), both in terms of the  
16 number and the monetary value. We calculated differences between individual-level  
17 disclosure rates in terms of the number and monetary value of TOVs, in order to assess if  
18 there was a relationship between the value of TOVs and non-disclosure. Using descriptive  
19 statistics, we also calculated the distribution of the monetary value of TOVs that were  
20 disclosed on the individual level. Because this TOV data was not normally distributed we  
21 report the minimum and maximum, median, interquartile range (IQR), and the 99% percentile  
22 value.  
23  
24  
25  
26  
27  
28  
29

### 30 ***Company-level spending and individual-level disclosure rates***

31 We used the same strategy as described above, but on a per company basis, to compute the  
32 number and monetary value of TOVs made by each company. Based on this information, we  
33 also calculated the individual-level disclosure rate for each company in 2015 and 2016. We  
34 did this both in terms of the number and monetary value of the TOVs, and both in total and  
35 per TOV type. Ten out of 107 companies in the 2015 database did not provide information on  
36 TOVs in aggregate, and for 2016 this was of 13 out of 109. Because we cannot know if this  
37 meant these companies failed to report payments or, alternatively, they had 100% individual-  
38 level disclosure, and therefore had nothing to report in aggregate, we excluded them from this  
39 analysis. We used descriptive statistics to depict the distribution of individual-level disclosure  
40 rates across remaining 97 and 96 companies in 2015 and 2016, respectively.  
41  
42  
43  
44  
45  
46  
47  
48  
49

### 50 ***Agreement between author-calculated and company-reported disclosure rates***

51 In the database, companies should report the number of recipients disclosed in aggregate for  
52 each TOV type as per cent of all recipients for that TOV type, i.e. 1 - the individual-level  
53 disclosure rate for each TOV type. However, the ABPI has reported that although the majority  
54 of companies in the 2015 version of the database correctly understood the instructions on how  
55  
56  
57  
58  
59  
60

1  
2  
3 to calculate this disclosure statistic, some companies appear to have misunderstood and  
4 instead provided the number of recipients disclosed in aggregate for each TOV type as per  
5 cent of *all* recipients that received payments from the company irrespective of TOV type.<sup>15</sup>  
6 To gain further clarity into this issue, and to see if inconsistencies did not occur in the 2016  
7 database, we compared the individual-level disclosure rates that we had calculated for each  
8 company (see above) with the individual-level disclosure rates directly reported by each  
9 company. Notably, because companies report disclosure rates for the number but not  
10 monetary value of TOVs we were restricted to comparing disclosure rates only for the former.  
11 Similarly, because companies report disclosure rates per TOV type, rather than across all  
12 TOV types, we compared disclosure rates on a TOV type basis.  
13  
14  
15  
16  
17  
18  
19

20 For this analysis we excluded companies that did not submit aggregate payments reports  
21 (n=10 in 2015; n=12 in 2016). We also excluded cases in which companies had submitted  
22 aggregate payments reports but had left the cell empty in the database that were to contain the  
23 disclosure statistic for a certain TOV type (n=83 in 2015 and n=69 in 2016) since it is  
24 impossible to ascertain whether an empty cell indicates that a company simply failed to report  
25 (i.e., a missing value), or that all payments of this TOV type were disclosed at the individual-  
26 level, or that no payments were made at all of this TOV type. A few companies reported  
27 decimals rather than percentages (e.g., 0,05 instead of 5%) and we changed those to  
28 percentages. We defined any difference between author-calculated and company-reported  
29 individual-level disclosure rates greater than one percentage point as discordant in order to  
30 exclude that differences were due to rounding. We calculated the percentage of concordant  
31 pairs and used descriptive statistics to analyse disparities between the computed disclosure  
32 rates.  
33  
34  
35  
36  
37  
38  
39  
40  
41  
42

### 43 ***Patient involvement***

44 No involvement  
45  
46  
47  
48  
49  
50  
51  
52  
53  
54  
55  
56  
57  
58  
59  
60

## Results

### *Disclosure UK definitions and variables*

Tables 1 and 2 summarise the definitions and variables in Disclosure UK relevant to HCPs. Consistent with the EFPIA standard, two higher-level TOV *categories* are used in reporting: “Contribution to costs for events” and “Fees for services and consultancy”, which are each split into two lower-level TOV *types*: “Registration fees” and “Travel & Accommodation” for events, and “Fees” and “Related expenses agreed in the fee for services and consultancy contract”, respectively.

**Table 1. Disclosure UK definitions related to transfers of value to healthcare professionals**

| Element                                  | Definition <sup>a</sup>                                                                                                                                                                                                                                                                                                                                                                                                                                                                                                      |
|------------------------------------------|------------------------------------------------------------------------------------------------------------------------------------------------------------------------------------------------------------------------------------------------------------------------------------------------------------------------------------------------------------------------------------------------------------------------------------------------------------------------------------------------------------------------------|
| <b>Healthcare professional</b>           | Members of the medical, dental, pharmacy and nursing professions and any other persons who in the course of their professional activities may administer, prescribe, purchase, recommend or supply a medicine.                                                                                                                                                                                                                                                                                                               |
| <b>Transfer of value</b>                 | A direct or indirect transfer of value, whether in cash, in kind or otherwise, made, whether for promotional purposes or otherwise, in connection with the development or sale of medicines. A direct transfer of value is one made directly by a company for the benefit of a recipient. An indirect transfer of value is one made on behalf of a company for the benefit of a recipient or through an intermediate and where the company knows or can identify the recipient that will benefit from the transfer of value. |
| <b>Contribution to costs for events</b>  | TOVs covering <i>registration fees</i> and <i>travel &amp; accommodation</i> for all promotional, scientific or professional meetings, congresses, conferences, symposia, and other similar events, excluding costs that are clearly related to R&D.                                                                                                                                                                                                                                                                         |
| <b>Fees for services and consultancy</b> | TOVs covering <i>fees</i> and <i>expenses</i> resulting from or related to contracts between companies and HCPs under which such HCPs provide services to companies, excluding costs that are clearly related to R&D.                                                                                                                                                                                                                                                                                                        |

<sup>a</sup> Definitions are derived from the EFPIA Disclosure code and the ABPI Code of Practice.

**Table 2. Mandatory and optional variables related to transfers of value to healthcare professionals in Disclosure UK**

|                                     |                                                                                                                                                                                                                                             |
|-------------------------------------|---------------------------------------------------------------------------------------------------------------------------------------------------------------------------------------------------------------------------------------------|
| <b>Individual level (mandatory)</b> | <ul style="list-style-type: none"> <li>• Title of HCP</li> <li>• Name of HCP</li> <li>• Country and city of principal practice of HCP</li> <li>• Principal practice address of HCP</li> <li>• Yearly amount per HCP and TOV type</li> </ul> |
|-------------------------------------|---------------------------------------------------------------------------------------------------------------------------------------------------------------------------------------------------------------------------------------------|

|                                    |                                                                                                                                                                                                                                                                       |
|------------------------------------|-----------------------------------------------------------------------------------------------------------------------------------------------------------------------------------------------------------------------------------------------------------------------|
| <b>Individual level (optional)</b> | <ul style="list-style-type: none"> <li>• Speciality of HCP</li> <li>• Role of HCP</li> <li>• Total yearly amount per HCP across all TOV types</li> </ul>                                                                                                              |
| <b>Aggregate (mandatory)</b>       | <p>For each TOV type</p> <ul style="list-style-type: none"> <li>• the number of recipients in the aggregate disclosure</li> <li>• the percentage of recipients in the aggregate disclosure</li> <li>• the aggregate amount attributable to such recipients</li> </ul> |

Each company aggregates its yearly payments at the level of individual HCP and TOV type. A corollary to this is that many HCPs have several TOV records in the database either because they have received payments of different TOV types from the same company and/or because they have received payments from more than one company; and therefore, the number of TOV records is greater than the number of HCPs in the database.

Companies should seek to report individual-level data, including the name, title, city and principal practice address of each TOV recipient, in addition to the monetary value of the TOV (Table 2). Payments to HCPs that decline giving consent to the publication of individual-level data are reported on an aggregate basis by each company, using the four lower-level TOV types mentioned above (see also Table 3). For such aggregate reporting, each company shall specify *for each TOV type*: (1) the total amount attributable to such recipients; (2) the number of recipients in the aggregate disclosure, and (3) the number of recipients disclosed in aggregate as percent of all recipients (i.e., reported at individual level and aggregate). For example, if a company paid ten HCPs £100 each to cover their registration fees for events, but only received consent to publish individual-level data from five, the company should report in the aggregate for “Registration fees”: (1) £500; (2) five recipients, and (3) 50%.

Notably, the database does not allow for calculating the number of HCPs that received payments in a particular year. This is because in the aggregate companies report information on the number of recipients per TOV type, rather than across all TOV types, and some HCPs may receive TOVs of different types from the same company, and therefore will be counted several times, and also because some HCPs may be counted several times if they have dealings with multiple companies.

### ***Comparison with US Open Payments Database***

Compared to the US “Sunshine Act” Open Payments Database, the most obvious difference is the possibility for companies in the UK, but not the US, to report payments in aggregate. Another key difference is that the UK database only includes payments by pharmaceutical companies, and is mandatory only for ABPI members, whereas reporting in the US is mandatory for all pharmaceutical companies as well as medical device manufacturers, regardless of trade group affiliation. However, the UK database includes payments to a larger spectrum of HCPs, including not only physicians but also e.g. pharmacists, nurses and even individuals who might not be HCPs such as NHS managers (in ABPI documents<sup>26</sup> this group is referred to as Other Relevant Decision Makers, or ORDMs, but in the database, and therefore in this study, they are counted as HCPs).

In addition, there are some important differences between UK and US databases related to the range of TOV types included and the variables describing the recipient HCP and the TOV. In this respect, the UK database is generally less informative and detailed. Regarding the range of TOV types, besides so-called General Payments that encompass the types of payments reported in Disclosure UK, the US database also includes individual-level data regarding two other payment categories: TOVs made in connection with a research agreement or research protocol (so-called Research Payments) and Physician Ownership or Investment Interest Information, including any immediate family member holding such interest.

Regarding the variables and level of detail in the Disclosure UK and the comparable US General Payments database, both contain a number of variables that provide basic information on the recipient HCP (see Table 2 for Disclosure UK), but the US database also contains a unique physician identification number that links physician records across program years and, possibly, to other databases. In addition, the US General Payments database contains a range of variables that provide further detail regarding the TOV including:

- (1) Information on up to five products in relation to which the payment was made (including product codes, names, categories and therapeutic areas);
- (2) The number of discrete payments being reported for each physician record, not only the total amount;
- (3) The method of payment used to pay the covered recipient or to make the TOV, e.g. in-kind items or services, or cash or cash equivalent;

- (4) More detail regarding TOV types including types such as “Food and Beverage”, “Education”, “Compensation for services other than consulting” (e.g., speaker fees), and “Honoraria”;
- (5) For “Travel and Lodging” payments, the destination where the covered HCP travelled.

The lack of such variables in Disclosure UK limits the types of analyses that can be made compared to the US.

### *Number and amount of payments in Disclosure UK*

We found that, in 2015, 107 companies reported a total of 54910 TOVs for a value of £50,967,728 (Table 3). In 2016, two more companies reported TOVs but spending decreased compared to 2015 by over £3,4 million (-7.3%; inflation-adjusted) to £47,548,253, and the number of TOVs decreased by 8.5%. In both years roughly 35% of the number of TOVs were consultancy fees but money-wise they corresponded to roughly 60%, reflecting the on average higher value of consultancy fee TOVs. Conversely, approximately 35% of the number of TOVs covered costs for travel and accommodation at events but they corresponded to roughly 20% of the total spending, reflecting the on average smaller size of such TOVs.

**Table 3. Transfers of value to UK healthcare professionals in 2015 and 2016**

|                    |                           | 2015          |            |                   |            | 2016          |            |                   |            | ΔN          | Δ£ <sup>a</sup> |
|--------------------|---------------------------|---------------|------------|-------------------|------------|---------------|------------|-------------------|------------|-------------|-----------------|
|                    |                           | N             | %          | £                 | %          | N             | %          | £                 | %          | %           | %               |
| <b>Events</b>      | <b>Registration fees</b>  | 7,877         | 14.3       | 3,445,579         | 6.8        | 7,441         | 14.8       | 3,293,209         | 6.9        | -5.5        | -5.1            |
|                    | <b>Travel &amp; Accom</b> | 19,138        | 34.9       | 10,692,849        | 21.0       | 17,445        | 34.7       | 9,856,619         | 20.7       | -8.8        | -8.5            |
| <b>Consultancy</b> | <b>Fees</b>               | 19,020        | 34.6       | 30,396,315        | 59.6       | 16,606        | 33.1       | 28,698,492        | 60.4       | -12.7       | -6.2            |
|                    | <b>Expenses</b>           | 8,875         | 16.2       | 6,432,985         | 12.6       | 8,750         | 17.4       | 5,699,934         | 12.0       | -1.4        | -12.0           |
| <b>Total</b>       |                           | <b>54,910</b> | <b>100</b> | <b>50,967,728</b> | <b>100</b> | <b>50,242</b> | <b>100</b> | <b>47,548,254</b> | <b>100</b> | <b>-8.5</b> | <b>-7.3</b>     |

<sup>a</sup> Inflation adjusted: +1.7% between 2015 and 2016.

In monetary value the largest decrease between 2015 and 2016 was seen for consultancy expenses (-12.0%; inflation-adjusted) but, interestingly, this was accompanied by only a minor decrease in the number of consultancy expenses TOVs (-1.4%), suggesting that the decrease in the monetary value of payments was due to fewer larger-size payments in 2016. Conversely, there was a moderate decrease in the monetary value of consultancy fee payments (-6.2%; inflation-adjusted), but this was accompanied by a greater decrease in the number of consultancy fees TOVs (-12.7%), suggesting that this decrease was associated with fewer smaller-size payments.

### *Variation in spending across companies*

For both years a large part of the TOVs concentrated in the hands of a narrow number of companies (Appendix Table 1). In 2015, the top 10, 20 and 50 spending companies reported 48.2%, 71.8% and 93.5% of the spending, respectively. The major spender in 2015 was AstraZenca (6.9%), followed by Bayer (6.2%) and Merck-Sharp & Dohme (6.0%). The median number of TOVs reported per company was 187 (min 1; max 3,521; IQR 580.5) and median company spending in 2015 was £141,895 (min £266; max £3,535,413; IQR £444,448).

In 2016, the picture was similar: the top 10, 20 and 50 spending companies reported 49.9%, 70.8% and 92.3% of all the spending, respectively, with Bayer (7.0%), Pfizer (6.9%) and Novo Nordisk (5.3%) on the top-3 list, and with AstraZenca and Merck-Sharp & Dohme now on fourth (5.2%) and eighth (4.3%) place. The median number of TOVs reported per company in 2016 was 172 (min 2; max 3,409; IQR 482), and median company spending was £147,490 (min £2,181; max £3,308,421; IQR £410,873), i.e., comparable to 2015.

### *Rates of individual-level disclosure*

For 2015 we established that 55.5% (30,478) of all TOVs were disclosed at the individual level, with the overall value of £24,428,619 (47.9%) (Table 4), consistent with the ABPI's estimates.<sup>15</sup> Regardless of TOV type, companies disclosed around 55% of the number of TOVs at the individual level, but in monies there was considerable variation in disclosure rates across TOV types. In particular, there appears to be a tendency to conceal payments for consultancies of larger size, as the disclosure rate for consultancy TOV types was clearly higher in number of TOVs (56.9% and 53.6%) than in cash amounts (47.9% and 38.4%).

**Table 4. Individual-level disclosures of transfers of value in 2015 and 2016**

|                    |                           | 2015             |                  | 2016             |                  |
|--------------------|---------------------------|------------------|------------------|------------------|------------------|
|                    |                           | % N <sup>a</sup> | % £ <sup>b</sup> | % N <sup>a</sup> | % £ <sup>b</sup> |
| <b>Events</b>      | <b>Registration fees</b>  | 54.6             | 56.0             | 64.4             | 64.1             |
|                    | <b>Travel &amp; Accom</b> | 55.4             | 51.3             | 64.6             | 64.7             |
| <b>Consultancy</b> | <b>Fees</b>               | 56.9             | 47.9             | 66.4             | 58.2             |
|                    | <b>Expenses</b>           | 53.6             | 38.4             | 60.9             | 51.9             |
| <b>Total</b>       |                           | <b>55.5</b>      | <b>47.9</b>      | <b>64.5</b>      | <b>59.2</b>      |

<sup>a</sup> Individual-level disclosure rate for the number of TOVs

<sup>b</sup> Individual-level disclosure rate for monetary value of TOVs



In 2016, the individual-level disclosure rate had increased markedly to 64.5% (32,407) of all TOVs for a total value of £28,145,091 (59.2%). However, despite the improved disclosure rate, the practice of concealing larger-size payments for consultancies remained (66.4% and 60.9 vs. 58.2% and 51.9%) (Table 4).

### *Pattern of individual-level disclosure*

Table 5 shows the distribution of individual-level disclosed TOVs. As expected, consultancy fees were more often larger than other TOVs types, and some of these payments were substantial: the top percentile included payments equal or larger than £11,012.3 (in 2015) and £12,857.8 (in 2016). However, and perhaps more surprisingly, there were some large payments covering events payments. For example, for travel & accommodation, the top percentile included payments equal or larger than £3,729 (in 2015) and £3,781.6 (in 2016), and the single largest disclosed payments were of £22,280 and £28,160.1, respectively.

**Table 5. Distribution of transfer of value sums (£) disclosed at the individual level**

|                    |                           | 2015           |        |       |          |          | 2016 |        |       |          |          |
|--------------------|---------------------------|----------------|--------|-------|----------|----------|------|--------|-------|----------|----------|
|                    |                           | Min            | Median | IQR   | 99%      | Max      | Min  | Median | IQR   | 99%      | Max      |
| <b>Events</b>      | <b>Registration fees</b>  | 10             | 394.1  | 292.6 | 1,698.9  | 19,836   | 10   | 395    | 306   | 1,515.2  | 4,880    |
|                    | <b>Travel &amp; Accom</b> | 1.5            | 252    | 465   | 3,729    | 22,280   | 1.5  | 289.3  | 535.2 | 3,781.6  | 28,160.1 |
| <b>Consultancy</b> | <b>Fees</b>               | 0 <sup>a</sup> | 750    | 950   | 11,012.3 | 54,700.9 | 14.8 | 750    | 1,100 | 12,857.8 | 81,130.2 |
|                    | <b>Expenses</b>           | 1              | 142.7  | 295.1 | 7,817.1  | 34,223   | 2    | 156.5  | 339.1 | 8,003.1  | 42,942.9 |

<sup>a</sup> Britannia Pharmaceuticals registered this payment and it likely represents a mistake

### *Differences in individual-level disclosure rates across companies*

There was major variation in the disclosure rates across companies (Figure 1; Appendix Table 1). In 2015, excluding the ten companies that did not submit reports regarding payments in aggregate, the median among the remaining 97 companies for TOV sums was 47.3%, with 75% of companies disclosing more than 72.8% of sums and 25% of companies disclosing less than 21.3% of sums at the individual level. This latter group included top-30 spenders like Merck Sharp & Dohme (1.2%), Allergan (12.3%), Bristol-Myers Squibb (20.8%), Napp (20.5%) and Boehringer Ingelheim (21.3%). There were fewer big companies on the other side of the spectrum: Teva (72.4%), Gilead (73.6%) and GlaxoSmithKline (95%). By 2016 individual-level disclosure rates had increased substantially (median 57.7%); still, 25% of companies included in this analysis disclosed less than 38.6% of the value of payments at the individual level, counting big spenders like Napp (10.5%), Allergan (20.8%), Novo Nordisk (31.7%), and Bayer (34%).



### *Ambiguity and inconsistency in company reporting of individual-level disclosure rates*

We compared the individual-level disclosure rates for the number of TOVs that we calculated ourselves on the basis of information in the database, on the one hand, and the disclosure rates reported directly by companies in the database, on the other. For this analysis, we had to exclude ambiguous cases (n=83 in 2015 and n=69 in 2016) (see Methods). Defining any difference greater than one percentage point as discordant, the percent agreement between what we calculated and what companies reported for each TOV type was only 62%-48% in 2015 (Table 6). Notably, the agreement was worse in 2016: 46%-30%, i.e., after the ABPI had highlighted the problem of reporting inconsistencies. In 108 of 143 (76%) (in 2015) and 194 of 197 (98%) (in 2016) of cases of disagreement, companies reported higher rates than what we calculated. In some cases, the difference between our calculations and what companies' reported was very large (Figure 2), more consistent with the idea that some companies had misunderstood how to compute disclosure rates. In most cases, however, the difference was smaller, albeit substantial, which makes it less likely to be due to confusion about how to compute disclosure rates. In sum, our findings point to continued and possibly augmented ambiguities and inconsistencies in reporting, and underline the limited transparency regarding how companies calculate disclosure rates.

**Table 6. Percent agreement between author-calculated and company-reported individual-level disclosure rates**

|                    |                           | 2015      |       | 2016      |       |
|--------------------|---------------------------|-----------|-------|-----------|-------|
|                    |                           | Agreement | n/N   | Agreement | n/N   |
| <b>Events</b>      | <b>Registration fees</b>  | 61%       | 40/66 | 46%       | 31/68 |
|                    | <b>Travel &amp; Accom</b> | 54%       | 40/74 | 41%       | 32/80 |
| <b>Consultancy</b> | <b>Fees</b>               | 51%       | 46/91 | 39%       | 36/93 |
|                    | <b>Expenses</b>           | 48%       | 35/73 | 30%       | 24/79 |

### **Discussion**

To the best of our knowledge, this is the first systematic analysis of the Disclosure UK database. Payments to HCPs totalling roughly £51 million and £47.5 million were reported in 2015 and 2016, respectively, concentrated in the hands of a limited number of big spenders. Consultancy-related payments comprised more than 70% of the total value, with the rest being costs for events. That the industry over the two-year period paid more than £30 million for events registration and travel and accommodation – which included some sizeable payments – is noteworthy in light of the criticism levied against industry sponsorship of

1  
2  
3 HCPs' conference and events attendance in the past,<sup>28 29</sup> and which has motivated the barring  
4 of such sponsorship by the industry trade group in Sweden<sup>7</sup> and at least one major company  
5 (i.e. GlaxoSmithKline).<sup>30</sup>  
6  
7

8  
9 We confirm preliminary analyses conducted on behalf of the ABPI<sup>16</sup> showing an increased  
10 tendency to disclose payments at the individual level – from 48% to 59% – and this might  
11 suggest that the willingness to participate in Disclosure UK will grow as more experience  
12 accumulates. However, our analysis goes further than this by showing differences in  
13 individual-level disclosure rates across TOV types and companies. Regarding differences  
14 across TOV types, our analysis suggests a practice of concealing larger-size payments for  
15 consultancies. Regarding variation across companies, a key finding is that some big spenders,  
16 like Bayer and Novo Nordisk, tended to eschew individual-level disclosures whilst others,  
17 such as GlaxoSmithKline, disclosed almost everything at the individual level. As debates  
18 about HCP willingness to disclose payments have focused mostly on HCP behaviour and  
19 motivation<sup>31 32</sup> our finding of major company variation is important because it shifts the focus  
20 to company characteristics, especially policies for collecting consent from HCPs, which in  
21 turn may be associated with more general corporate cultures, as another set of likely  
22 determinants of HCP disclosure consent.  
23  
24  
25  
26  
27  
28  
29  
30  
31

32  
33 The launch of Disclosure UK was heralded as a breakthrough in pharmaceutical industry  
34 transparency.<sup>33</sup> Although the database does represent a step towards enhanced transparency,  
35 our study highlights deficiencies that undermine its usefulness for understanding industry  
36 connects to HCPs and associated impact on healthcare delivery. First, and consistent with  
37 EFPIA guidelines, the database only contains aggregate data on R&D payments and it omits  
38 HCPs' ownership or investment interest – two areas highlighted as important by research on  
39 industry payments in the US.<sup>34</sup> Second, the fact that HCPs can opt-out from individual-level  
40 disclosure, together with the fact that individual-level disclosure rates vary substantially  
41 between companies, means that, due to the risk of participation bias, it is precarious to  
42 investigate the association between receiving payments and HCP behaviour (e.g. prescribing)  
43 or characteristics (e.g. gender or speciality), as has been done extensively with US data.<sup>3 18-24</sup>  
44 Non-disclosure can also create bias because some HCPs may choose to disclose some types of  
45 payments but not other (e.g., events but not consultancies) or disclose their relationships with  
46 some companies but not other. A third limitation, revealed by our comparison with the US  
47 Open Payments Database, is the lack of information on a number of characteristics that  
48  
49  
50  
51  
52  
53  
54  
55  
56  
57  
58  
59  
60

1  
2  
3 provide relevant details regarding the payment. For example, a recent study using information  
4 in the US Open Payments Database on the products connected to payments showed that  
5 firms' invested great sums to promote drugs for which more innovative, effective, safer and  
6 cheaper alternatives existed.<sup>35</sup> Unfortunately, this is a kind of analysis not possible to do with  
7 UK data because companies are not asked to disclose information on the products in relation  
8 to which the payment was made.  
9  
10  
11  
12  
13

14 Another aspect of Disclosure UK that needs urgent improvement relates to how companies  
15 report payments in aggregate. We found that companies regularly left cells empty in the  
16 aggregate part of the database where they should inform on the individual-level disclosure  
17 rate. Companies should never leave cells empty as this creates ambiguity. Another problem  
18 concerning the present aggregate payments reporting standard – and which applies to all  
19 countries relying on the EFPIA-based self-regulatory model – is that, arguably, there are more  
20 relevant and easily interpretable data elements that companies could report other than the  
21 number of recipients disclosed in aggregate as the percent of all recipients for each TOV type.  
22 Intuitively, one would expect companies to summarise their individual-level disclosure rates  
23 in total (i.e., what is the company's overall disclosure rate?) and for each TOV type separately  
24 (i.e. what is the company's disclosure rate for, for example, consultancy fees?). Companies  
25 should provide this information both in terms of the number and value of TOVs – currently  
26 they only provide rates calculated for the number of TOVs. Should our reporting suggestions  
27 be adopted this would allow for easy comparison across years, firms and countries.  
28 Furthermore, it might offer a simple mechanism for increasing disclosure because publicising  
29 disclosure rates in a consistent and interpretable format is likely to put pressure on companies  
30 to improve their figures to avoid damage to their reputation for transparency. That the current  
31 aggregate reporting standard is unintuitive is underlined by the inconsistencies, and possible  
32 inaccuracies, in companies' reporting, and which – despite being highlighted by the ABPI –  
33 continued into the 2016 version of the database. The existence of ambiguity and inconsistency  
34 points to a broader issue of limited data quality and lack of oversight with implications for  
35 other countries too – and especially for European countries that lack a central and analysable  
36 registry for payments,<sup>7</sup> and that therefore rely even more on accurate and comparable  
37 reporting by companies as there is limited possibilities to independently analyse data.  
38  
39  
40  
41  
42  
43  
44  
45  
46  
47  
48  
49  
50  
51  
52  
53  
54  
55  
56  
57  
58  
59  
60

### ***Strength and limitations***

The main strengths of this paper are that it is based on the full dataset for two years and that calculations are consistent with the ABPI's, which corroborates our methodology. The main limitation is that we have no way of checking the accuracy of the data. Furthermore, transparency requirements do not apply to manufacturers of generics and over-the-counter medicines and exclude some payments such as food and drinks;<sup>7</sup> thus, our analysis likely underestimates the true extent of payments.<sup>36</sup> Also, we did not take into account differences in companies' interpretation and reporting of some data elements that are detailed in the methodological note that each company provides.<sup>37 38</sup> Of relevance to disclosure rates is the issue of how companies deal with cases where HCPs consented to the disclosure of some TOVs but refused others. The vast majority of companies that specify a rule for this state that they disclose all TOVs to those recipients in the aggregate section, i.e., they do not allow for partial disclosure. However, four companies in 2015<sup>37</sup> and three in 2016<sup>38</sup> reported in their methodological notes that, at least in some circumstances, partial disclosure was allowed, meaning that an individual may be counted in both in the individually-named and aggregate sections, and it is unclear if this influences the disclosure rates calculated by these companies. Furthermore, some companies choose to report payments with and some without VAT and other taxes (e.g., income tax and national insurance), and some companies' procedures vary according to the type or recipient of the payment. Comparison of the value of TOVs made by two companies may also be distorted by the fact there is variation among companies with regard to whether they consider TOVs to HCP members of their own staff to be within the scope of the disclosure, and in how they classify for the purposes of disclosure (i.e., as HCPs or healthcare organisation) self-incorporated HCPs or companies owned and/or run by an HCP. Given the complexity, these methodological matters should become the subject of a separate study. Finally, we did not include payments for R&D that are reported in aggregate by companies. Future studies should investigate R&D payments, as well as the payments to healthcare organisations, and may also choose to extend the analysis to other European countries' databases where possible, for example, to explore differences in individual-level disclosures across countries on a company-per-company basis.

## References

1. Field MJ, Lo B. Conflict of interest in medical research, education, and practice: National Academies Press 2009.
2. Lundh A, Sismondo S, Lexchin J, et al. Industry sponsorship and research outcome. *Cochrane Database Syst Rev* 2012;12(12)
3. Yeh JS, Franklin JM, Avorn J, et al. Association of Industry Payments to Physicians With the Prescribing of Brand-name Statins in Massachusetts. *JAMA Intern Med* 2016;176(6):763-68.
4. Stamatakis E, Weiler R, Ioannidis J. Undue industry influences that distort healthcare research, strategy, expenditure and practice: a review. *Eur J Clin Invest* 2013;43(5):469-75.
5. Dunn AG, Coiera E, Mandl KD, et al. Conflict of interest disclosure in biomedical research: a review of current practices, biases, and the role of public registries in improving transparency. *Res Integr Peer Rev* 2016;1(1):1-8. doi: 10.1186/s41073-016-0006-7
6. Hood C. Accountability and transparency: Siamese twins, matching parts, awkward couple? *West European Politics* 2010;33(5):989-1009.
7. Fabbri A, Santos A, Mezinska S, et al. Sunshine Policies and Murky Shadows in Europe: Disclosure of Pharmaceutical Industry Payments to Health Professionals in Nine European Countries. *Int J Health Policy Manag* 2018; E-pub ahead of print
8. European Federation of Pharmaceutical Industries and Associations (EFPIA). EFPIA HCP/HCO DISCLOSURE CODE 2014 [Available from: <https://www.efpia.eu/media/25837/efpia-disclosure-code.pdf>.]
9. Zetterqvist AV, Merlo J, Mulinari S. Complaints, complainants, and rulings regarding drug promotion in the United Kingdom and Sweden 2004–2012: A quantitative and qualitative study of pharmaceutical Industry self-regulation. *PLoS Med* 2015;12(2):e1001785.
10. Vilhelmsson A, Davis C, Mulinari S. Pharmaceutical industry off-label promotion and self-regulation: a document analysis of off-label promotion rulings by the United Kingdom Prescription Medicines Code of Practice Authority 2003–2012. *PLoS Med* 2016;13(1):e1001945.
11. Kmietowicz Z. Disclosure UK website gives “illusion of transparency,” says Goldacre. *BMJ* 2016;354 doi: 10.1136/bmj.i3760
12. Hawkes N. Doctors getting biggest payments from drug companies don’t declare them on new website. *BMJ* 2016;354 doi: 10.1136/bmj.i3679
13. Adlington K, Godlee F. Disclosure UK: transparency should no longer be an optional extra. *BMJ* 2016;354 doi: 10.1136/bmj.i3730
14. McCartney M. Optional disclosure of payments is pointless. *BMJ* 2016;354 doi: 10.1136/bmj.i3692
15. Association of the British Pharmaceutical Industry (ABPI). Pharmaceutical Industry Disclosure UK: six month figures show increase in research spend and lower than estimated number of healthcare professionals disclosing payments from industry, 27 Mar 2017. [Available from: <https://www.abpi.org.uk/media-centre/news/2017/march/pharmaceutical-industry-disclosure-uk-six-month-figures/>]
16. Association of the British Pharmaceutical Industry (ABPI). Significant increase in healthcare professionals disclosing partnerships with the pharmaceutical industry, 30 Jun 2017. [Available from: <https://www.abpi.org.uk/media-centre/news/2017/june/significant-increase-in-healthcare-professionals-disclosing-partnerships-with-the-pharmaceutical-industry/>]



17. NHS. NHS England publish new guidelines on tackling conflicts of interest, 9 Feb 2017. [Available from: <https://www.england.nhs.uk/2017/02/coi-guidelines/>]
18. Taylor SC, Huecker JB, Gordon MO, et al. Physician-industry interactions and anti-vascular endothelial growth factor use among US ophthalmologists. *JAMA Ophthalmol* 2016;134(8):897-903.
19. DeJong C, Aguilar T, Tseng C-W, et al. Pharmaceutical industry-sponsored meals and physician prescribing patterns for Medicare beneficiaries. *JAMA Intern Med* 2016;176(8):1114-10.
20. Fleischman W, Agrawal S, King M, et al. Association between payments from manufacturers of pharmaceuticals to physicians and regional prescribing: cross sectional ecological study. *BMJ* 2016;354:i4189.
21. Perlis RH, Perlis CS. Physician Payments from Industry Are Associated with Greater Medicare Part D Prescribing Costs. *PLOS ONE* 2016;11(5):e0155474. doi: 10.1371/journal.pone.0155474
22. Eloy JA, Bobian M, Svider PF, et al. Association of Gender With Financial Relationships Between Industry and Academic Otolaryngologists. *JAMA Otolaryngol Head Neck Surg* 2017;143(8):796-802. doi: 10.1001/jamaoto.2017.0276.
23. Rose SL, Sanghani RM, Schmidt C, et al. Gender Differences in Physicians' Financial Ties to Industry: A Study of National Disclosure Data. *PLOS ONE* 2015;10(6):e0129197. doi: 10.1371/journal.pone.0129197
24. Marshall DC, Jackson ME, Hattangadi-Gluth JA. Disclosure of industry payments to physicians: an epidemiologic analysis of early data from the open payments program. *Mayo Clin Proc* 2016;91(1):84-96. doi: 10.1016/j.mayocp.2015.10.016.
25. Baxalta. Baxalta Disclosure Methodology Summary – 2015 Payments, 2016. [Available from: <https://www.shire.com/-/media/shire/shireglobal/shirecom/pdf/files/efpia/2015/baxalta-methodology-uk-english.pdf?la=en&hash=EE572FEA5FB91FB3B0553F4AD90716563488FB80>]
26. Association of the British Pharmaceutical Industry (ABPI). The ABPI Code of Practice for the Pharmaceutical Industry, 2016. [Available from: <http://www.pmcpa.org.uk/theCode/Documents/Code%20of%20Practice%202016%20.pdf>]
27. Association of the British Pharmaceutical Industry (ABPI). ABPI Disclosure Template, 2014. [Available from: <http://www.pmcpa.org.uk/media/Pages/Disclosure.aspx>]
28. Robertson J, Moynihan R, Walkom E, et al. Mandatory disclosure of pharmaceutical industry-funded events for health professionals. *PLoS Med* 2009;6(11):e1000128.
29. Rutledge P, Crookes D, McKinstry B, et al. Do doctors rely on pharmaceutical industry funding to attend conferences and do they perceive that this creates a bias in their drug selection? Results from a questionnaire survey. *Pharmacoepidemiol Drug Saf* 2003;12(8):663-67.
30. GlaxoSmithKline. Disclosure of payments made to HCPs in the UK, 2016. [Available from: <https://www.gsk.com/en-gb/responsibility/our-behaviour/engaging-with-healthcare-professionals/europe/united-kingdom/>]
31. Torjesen I. GMC says it can't force doctors to disclose payments from drug companies. *BMJ* 2016;354:i3806
32. Association of the British Pharmaceutical Industry (ABPI) and NHS England. Joint Letter from ABPI and NHS England about Disclosure, Dec 22 2017 [Available from: <http://www.abpi.org.uk/media/4589/disclosure-uk-letter-22122017.pdf>]
33. Association of the British Pharmaceutical Industry (ABPI). Pharmaceutical industry spends £340.3m on working in partnership with leading UK health experts and organisations to improve patient care, 29 Jun 2016. [Available from:

- <http://www.abpi.org.uk/media-centre/news/2016/june/pharmaceutical-industry-spends-3403m-on-working-in-partnership>]
34. Agrawal S, Brown D. The Physician Payments Sunshine Act -Two Years of the Open Payments Program. *New Eng J Med* 2016;374(10):906-09.
35. Greenway T, Ross JS. US drug marketing: how does promotion correspond with health value? *BMJ* 2017;357:j1855.
36. Fabbri A, Grundy Q, Mintzes B, et al. A cross-sectional analysis of pharmaceutical industry-funded events for health professionals in Australia. *BMJ Open* 2017;7(6) doi: 10.1136/bmjopen-2017-016701
37. RAND Europe and Association of the British Pharmaceutical Industry (ABPI). Disclosure UK: Understanding the data. Guidance notes for analysis of the data, June 2016. [Available from: <http://www.abpi.org.uk/ethics/ethical-responsibility/disclosure-uk/explore-the-data-further/>]
38. RAND Europe and Association of the British Pharmaceutical Industry (ABPI). Disclosure UK: Understanding the data. Guidance notes for analysis of the data, June 2017. [Available from: <http://www.abpi.org.uk/ethics/ethical-responsibility/disclosure-uk/explore-the-data-further/>]

## Figure Legends

**Figure 1.** Box plots show author-calculated individual-level disclosure rates across companies in the 2015 (n=96) and 2016 (n=97) version of Disclosure UK. White depicts the number of TOVs; grey depicts monetary value of TOVs.

**Figure 2.** Box plots show the difference in percentage points between company-reported and author-calculated individual-level disclosure rates for the number of TOVs in 2015 and 2016 for each TOV type. Only discordant pairs are shown, i.e. differences larger than +/- 1.0 percentage point. Number of discordant pairs (n) in each plot are shown. Reference line indicates zero percentage point difference.

**Author statement:** SM conceived and drafted the paper, collected and analysed the data. PO contributed to concept development, data analysis and writing.

**Competing Interests:** None

**Funding:** This work was supported by The Swedish Research Council for Health, Working Life and Welfare (FORTE), grant no. 2016-00875 awarded to SM and PO.

**Data sharing statement:** Databases are publically available on ABPI webpage

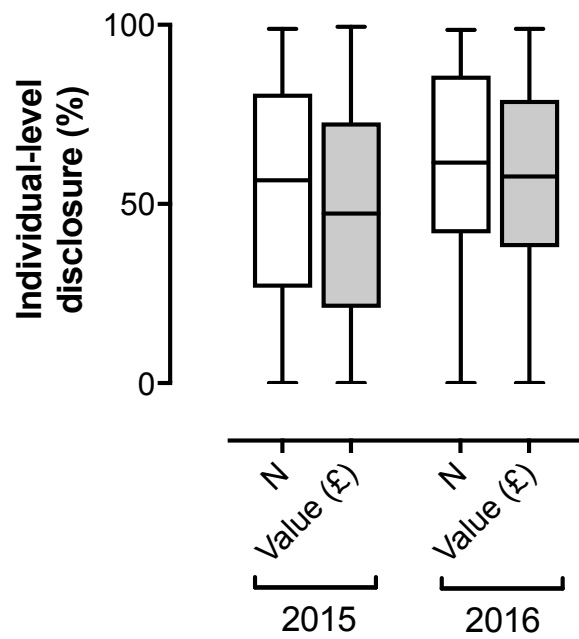

**Figure 1**



1  
2  
3  
4  
5  
6  
7  
8  
9  
10  
11  
12  
13  
14  
15  
16  
17  
18  
19  
20  
21  
22  
23  
24  
25  
26  
27  
28  
29  
30  
31  
32  
33  
34  
35  
36  
37  
38  
39  
40  
41  
42  
43  
44  
45  
46  
47  
48  
49  
50  
51  
52  
53  
54  
55  
56  
57  
58  
59  
60

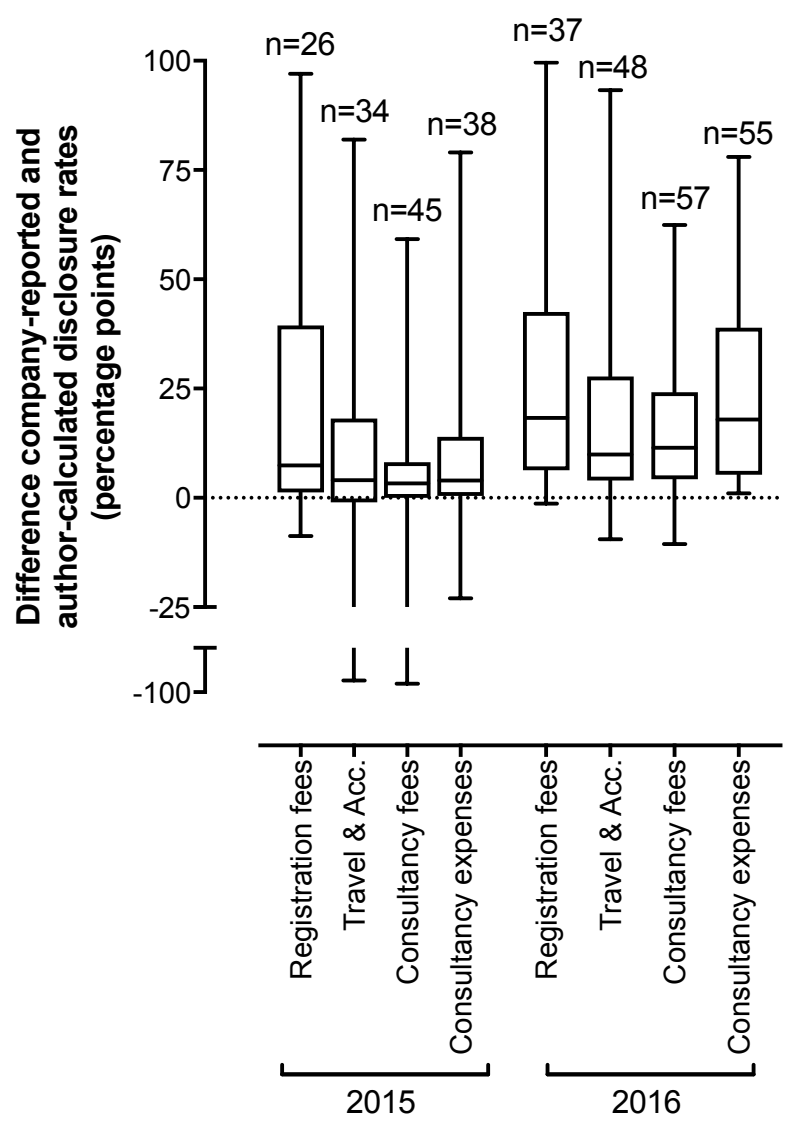

Figure 2

**Appendix Table 1. Transfers of value to UK healthcare professionals: value, numbers and individual-level disclosure rates per company in 2015 and 2016**

| Company <sup>a</sup>  | 2015 <sup>b,c</sup> |        |      |        | 2016 <sup>b,c</sup> |        |      |        |
|-----------------------|---------------------|--------|------|--------|---------------------|--------|------|--------|
|                       | £                   | Rate £ | N    | Rate N | £                   | Rate £ | N    | Rate N |
| Bayer                 | 3159751.53          | 24.9%  | 2817 | 26.3%  | 3308420.84          | 33.9%  | 3090 | 34.5%  |
| AstraZeneca           | 3535413.23          | 66.9%  | 2631 | 88.1%  | 2465100.23          | 78.5%  | 2161 | 94.0%  |
| Pfizer                | 2509453.01          | 51.7%  | 3263 | 62.6%  | 3259314.86          | 88.8%  | 3409 | 97.2%  |
| Janssen-Cilag         | 2912280.38          | 68.4%  | 3521 | 85.3%  | 2401589.87          | 69.7%  | 2635 | 84.8%  |
| Merck Sharp & Dohme   | 3076957.74          | 1.2%   | 2568 | 1.8%   | 2031187.84          | 67.8%  | 1753 | 60.1%  |
| Novo Nordisk          | 2222001.79          | 25.9%  | 2099 | 34.2%  | 2517087.73          | 31.7%  | 1984 | 40.9%  |
| Novartis              | 2211719.11          | 57.8%  | 2322 | 77.9%  | 2151112.54          | 85.3%  | 2520 | 93.1%  |
| Abbvie                | 1564813.16          | 59.2%  | 1512 | 64.0%  | 2053533.0           | 65.3%  | 1929 | 66.0%  |
| Sanofi Aventis        | 1466907.46          | 45.7%  | 1016 | 74.3%  | 1872099.77          | 60.2%  | 1406 | 85.3%  |
| Eli Lilly             | 1536223.0           | 38.2%  | 1811 | 44.2%  | 1677839.0           | 42.5%  | 2193 | 43.6%  |
| Astellas              | 1827995.2           | 55.4%  | 3019 | 56.6%  | 1215637.23          | 63.1%  | 1947 | 62.3%  |
| Roche                 | 1455735.79          | 54.8%  | 1513 | 52.5%  | 1430433.44          | 55.3%  | 1352 | 50.9%  |
| Gilead                | 1306053.44          | 73.6%  | 1046 | 80.1%  | 1478764.99          | 71.8%  | 1295 | 85.9%  |
| Bristol-Myer Squibb   | 1549787.0           | 20.8%  | 1055 | 28.1%  | 851293.86           | 44.0%  | 966  | 30.7%  |
| Allergan              | 1306149.86          | 12.3%  | 1416 | 10.2%  | 1032918.16          | 20.8%  | 1004 | 6.5%   |
| GlaxoSmithKline       | 1456604.18          | 94.7%  | 922  | 96.7%  | 456573.77           | 94.7%  | 224  | 93.3%  |
| Takeda                | 940687.85           | 39.7%  | 986  | 58.2%  | 728964.2            | 53.5%  | 730  | 57.3%  |
| Napp                  | 628996.24           | 20.5%  | 1083 | 13.1%  | 976205.64           | 10.5%  | 841  | 10.1%  |
| Merck Serono          | 754664.68           | 39.4%  | 790  | 49.1%  | 826112.82           | 38.9%  | 920  | 41.5%  |
| Servier               | 773827.0            | 26.4%  | 993  | 42.3%  | 652946.0            | 34.4%  | 769  | 54.0%  |
| Boehringer Ingelheim  | 1048816.74          | 21.3%  | 982  | 17.0%  | 305666.53           | 33.1%  | 393  | 32.8%  |
| Amgen                 | 521029.24           | 70.1%  | 586  | 78.0%  | 746845.6            | 74.5%  | 618  | 81.9%  |
| Teva                  | 645267.2            | 72.7%  | 1004 | 92.7%  | 613419.32           | 89.0%  | 938  | 94.3%  |
| Celgene               | 625409.08           | 76.4%  | 681  | 91.8%  | 543539.96           | 92.2%  | 616  | 97.4%  |
| Biogen                | 591279.32           | 39.1%  | 481  | 36.2%  | 548807.95           | 55.7%  | 534  | 55.4%  |
| Lundbeck              | 640573.65           | 71.4%  | 546  | 81.5%  | 474701.11           | 80.2%  | 288  | 87.2%  |
| Shire                 | 489890.6            | 40.6%  | 753  | 50.5%  | 609993.99           | 29.3%  | 854  | 41.6%  |
| Chiesi                | 444695.41           | 47.3%  | 993  | 55.0%  | 458128.85           | 49.5%  | 913  | 68.7%  |
| Alexion               | 368849.66           | N/A    | 192  | N/A    | 503918.85           | 75.7%  | 384  | 86.2%  |
| Ferring               | 307893.54           | 97.0%  | 681  | 97.9%  | 407998.51           | 98.3%  | 651  | 98.6%  |
| Leo Pharma            | 407685.31           | 79.8%  | 477  | 83.0%  | 286664.94           | 53.1%  | 375  | 70.4%  |
| Ipsen                 | 301323.9            | 19.2%  | 408  | 27.0%  | 374106.85           | 52.9%  | 530  | 58.5%  |
| Actelion              | 313106.09           | N/A    | 257  | N/A    | 356376.53           | N/A    | 303  | N/A    |
| Otsuka                | 408626.56           | 62.9%  | 431  | 61.3%  | 244212.9            | 70.5%  | 280  | 70.0%  |
| UCB Pharma            | 345118.97           | 89.6%  | 482  | 95.9%  | 301511.22           | 74.7%  | 388  | 76.5%  |
| Mundipharma           | 352716.36           | 31.4%  | 277  | 37.9%  | 270516.63           | 32.2%  | 209  | 30.1%  |
| Alcon                 | 63003.67            | 64.3%  | 107  | 68.2%  | 545034.66           | 4.4%   | 387  | 9.6%   |
| Sunovion              | 199678.54           | 11.1%  | 359  | 5.0%   | 389470.11           | 20.8%  | 404  | 16.1%  |
| Britannia Pharmaceut. | 306612.79           | 31.4%  | 519  | 27.6%  | 275986.24           | 10.8%  | 296  | 18.2%  |
| Genzyme               | 485188.61           | 59.7%  | 363  | 73.6%  |                     |        |      |        |
| Almirall              | 278767.32           | 36.7%  | 360  | 33.9%  | 199570.03           | 25.8%  | 264  | 24.6%  |
| Eisai                 | 223359.54           | 1.5%   | 310  | 1.9%   | 245975.76           | 50.0%  | 390  | 47.7%  |
| Baxter                | 255137.4            | 78.1%  | 745  | 68.3%  | 213814.37           | 85.4%  | 605  | 79.2%  |
| Sandoz                | 227441.4            | 46.6%  | 336  | 47.9%  | 215214.15           | 66.1%  | 291  | 59.1%  |
| Grünenthal            | 246726.43           | 71.4%  | 261  | 73.9%  | 190316.65           | 56.6%  | 169  | 63.9%  |
| Daiichi Sankyo        | 220747.0            | 82.1%  | 120  | 73.3%  | 189262.35           | N/A    | 99   | N/A    |
| Chugai Pharma         | 286373.49           | 17.4%  | 258  | 24.4%  | 112438.72           | 42.4%  | 208  | 41.3%  |
| Stirling Anglian      | 294263.67           | 13.7%  | 138  | 15.9%  | 99271.44            | 0.0%   | 7    | 0.0%   |
| Jazz                  | 188260.97           | N/A    | 234  | N/A    | 197620.41           | 87.1%  | 215  | 92.6%  |
| A. Menarini           | 183910.75           | 38.5%  | 290  | 45.9%  | 199534.57           | 47.6%  | 425  | 44.9%  |
| Norgine               | 249679.0            | 90.4%  | 503  | 90.9%  | 126734.0            | 95.3%  | 310  | 96.8%  |
| Vifor                 | 177596.18           | 46.8%  | 221  | 50.2%  | 198170.14           | 52.8%  | 241  | 46.5%  |
| Merz Pharma           | 189462.24           | 26.8%  | 321  | 10.6%  | 185739.27           | 82.4%  | 191  | 89.5%  |
| Tillotts Pharma       | 176466.55           | 48.1%  | 251  | 42.2%  | 166281.0            | 40.8%  | 294  | 38.1%  |
| Sobi                  | 112196.0            | 82.9%  | 142  | 84.5%  | 201602.0            | 79.2%  | 195  | 89.7%  |
| Bausch & Lomb         | 99214.94            | 89.6%  | 72   | 94.4%  | 213391.81           | 98.0%  | 38   | 89.5%  |
| CSL Behring           | 127282.86           | 13.9%  | 208  | 18.8%  | 180149.66           | 17.8%  | 246  | 19.5%  |
| Alimera               | 141895.08           | 59.2%  | 145  | 60.7%  | 104980.22           | 71.6%  | 120  | 73.3%  |

|                       |                  |              |              |              |                    |              |              |              |
|-----------------------|------------------|--------------|--------------|--------------|--------------------|--------------|--------------|--------------|
| Baxalta               | 108841.04        | 72.9%        | 109          | 81.7%        | 112591.45          | 21.6%        | 104          | 48.1%        |
| Santen                | 89402.76         | 40.5%        | 98           | 62.2%        | 117740.97          | 59.3%        | 128          | 65.6%        |
| Pierre Fabre          | 139369.27        | 99.5%        | 187          | 98.9%        | 65778.26           | N/A          | 96           | N/A          |
| Flynn                 | 109136.69        | 97.3%        | 109          | 90.8%        | 81375.13           | 98.9%        | 189          | 98.4%        |
| Sanofi Pasteur MSD    | 89631.94         | 99.5%        | 92           | 97.8%        | 99363.2            | 93.8%        | 129          | 90.7%        |
| Actavis               | 35417.52         | 30.5%        | 115          | 37.4%        | 147490.36          | 25.8%        | 156          | 80.1%        |
| Bial Pharma UK        |                  |              |              |              | 176271.02          | 69.6%        | 172          | 56.4%        |
| Besins                | 82198.2          | 58.3%        | 149          | 57.0%        | 85835.68           | 84.9%        | 152          | 78.3%        |
| Meda                  | 81096.74         | 16.2%        | 144          | 25.0%        | 78158.34           | 55.3%        | 115          | 54.8%        |
| ALK-Abello            | 86092.07         | 87.6%        | 111          | 86.5%        | 72616.23           | 95.9%        | 132          | 93.9%        |
| Shionogi              | 39219.34         | 28.7%        | 46           | 13.0%        | 110557.95          | 78.8%        | 18           | 50.0%        |
| BioMarin Europe       | 99611.0          | 84.2%        | 79           | 94.9%        | 47256.27           | 82.3%        | 37           | 89.2%        |
| Thea                  | 57837.2          | 0.0%         | 67           | 0.0%         | 88595.53           | 0.0%         | 161          | 0.0%         |
| Dermal                | 68976.77         | 87.6%        | 150          | 79.3%        | 72868.4            | 85.3%        | 133          | 73.7%        |
| Gedeon Richter        | 93535.33         | 51.9%        | 154          | 56.5%        | 45916.67           | 37.6%        | 78           | 52.6%        |
| Pharma Mar            | 43886.92         | 50.5%        | 97           | 48.5%        | 92639.69           | 66.2%        | 153          | 75.2%        |
| Consilient Health     | 79285.0          | 59.3%        | 60           | 61.7%        | 53710.0            | 43.5%        | 73           | 38.4%        |
| Fresenius-Kabi        | 32517.14         | 8.6%         | 65           | 6.2%         | 95531.07           | 71.3%        | 275          | 75.6%        |
| Vifor F. Med. Care R. | 17545.93         | 6.0%         | 12           | 33.3%        | 97196.1            | 52.7%        | 55           | 52.7%        |
| Galen                 | 70097.81         | 94.2%        | 58           | 98.3%        | 43287.14           | 98.3%        | 60           | 96.7%        |
| Hospira               | 77501.37         | 0.0%         | 87           | 0.0%         | 24779.61           | N/A          | 23           | N/A          |
| Biotest               | 54416.34         | 51.3%        | 112          | 77.7%        | 45528.94           | 74.9%        | 102          | 82.4%        |
| Octapharma            | 42296.03         | 15.1%        | 48           | 52.1%        | 57424.94           | 45.9%        | 69           | 60.9%        |
| Profile Pharma        | 40829.51         | 75.0%        | 22           | 86.4%        | 58360.36           | 58.7%        | 70           | 48.6%        |
| ApoPharma             | 89730.81         | 2.0%         | 12           | 16.7%        | 8079.0             | 50.0%        | 15           | 20.0%        |
| Orion Pharma          | 73501.22         | 80.5%        | 336          | 69.0%        | 22042.33           | N/A          | 43           | N/A          |
| RB                    | 33609.0          | 90.6%        | 29           | 82.8%        | 51831.91           | 97.5%        | 48           | 93.8%        |
| Grifols               |                  |              |              |              | 76806.76           | 34.3%        | 99           | 42.4%        |
| Novex                 | 44000.0          | 34.0%        | 10           | 30.0%        | 25675.7            | 56.5%        | 9            | 33.3%        |
| Guerbet Laboratories  | 25860.99         | 17.0%        | 40           | 12.5%        | 41030.23           | 63.2%        | 37           | 45.9%        |
| PTC Therapeutics      | 12397.2          | 13.0%        | 20           | 15.0%        | 52998.57           | 94.6%        | 58           | 89.7%        |
| Intercept Pharma      |                  |              |              |              | 62202.0            | 15.7%        | 27           | 48.1%        |
| Diurnal               | 34223.0          | N/A          | 1            | N/A          | 19936.0            | N/A          | 14           | N/A          |
| HRA Phara             | 50906.76         | N/A          | 26           | N/A          | 2181.0             | N/A          | 2            | N/A          |
| BGP Products          | 52906.5          | 10.8%        | 89           | 19.1%        |                    |              |              |              |
| Bracco                | 8497.98          | 39.4%        | 26           | 23.1%        | 39962.23           | 94.4%        | 34           | 82.4%        |
| GE Healthcare         |                  |              |              |              | 48089.0            | 14.3%        | 66           | 18.2%        |
| Alliance              | 14547.75         | 72.2%        | 36           | 83.3%        | 29486.15           | N/A          | 79           | N/A          |
| Syner-med             | 11109.38         | N/A          | 20           | N/A          | 30180.03           | N/A          | 52           | N/A          |
| Aegerion              | 16589.98         | N/A          | 13           | N/A          | 13610.19           | 42.3%        | 14           | 85.7%        |
| Shield TX             |                  |              |              |              | 29447.7            | 97.2%        | 45           | 95.6%        |
| Valneva               |                  |              |              |              | 27379.38           | N/A          | 4            | N/A          |
| Orphan Europe         | 25831.44         | 93.0%        | 15           | 73.3%        |                    |              |              |              |
| Seqirus               |                  |              |              |              | 24263.26           | N/A          | 4            | N/A          |
| Bio Products          | 13636.52         | 12.0%        | 34           | 29.4%        | 8698.44            | 71.3%        | 20           | 95.0%        |
| Martindale            | 14581.65         | 0.0%         | 17           | 0.0%         | 7366.37            | 7.5%         | 7            | 42.9%        |
| Amdipharm Mercury     | 19916.43         | 43.9%        | 30           | 56.7%        |                    |              |              |              |
| Amicus Therapeutics   |                  |              |              |              | 17583.14           | 0.0%         | 16           | 0.0%         |
| CEB Pharma            | 15431.98         | 83.9%        | 62           | 83.9%        |                    |              |              |              |
| Fresenius Med. Care   |                  |              |              |              | 15298.49           | 52.8%        | 10           | 60.0%        |
| Nicovations           | 12331.0          | 0.0%         | 14           | 0.0%         |                    |              |              |              |
| Accretio              | 2460.0           | 67.0%        | 8            | 75.0%        | 8906.71            | 66.7%        | 17           | 70.6%        |
| Mitsubishi Tanabe     | 4988.0           | 60.0%        | 7            | 85.7%        | 5124.2             | N/A          | 13           | N/A          |
| Rosemont Pharmac.     | 5235.17          | 32.0%        | 4            | 75.0%        | 4646.93            | 48.4%        | 5            | 80.0%        |
| Cuxson Gerard         | 2799.5           | 0.0%         | 9            | 0.0%         | 4369.0             | 0.0%         | 13           | 0.0%         |
| Tesaro                |                  |              |              |              | 6726.51            | 67.8%        | 8            | 62.5%        |
| Augettant             | 1459.51          | N/A          | 1            | N/A          | 4153.47            | N/A          | 5            | N/A          |
| STD Pharmaceuticals   | 600.0            | N/A          | 1            | N/A          |                    |              |              |              |
| Special Products      | 266.2            | N/A          | 2            | N/A          |                    |              |              |              |
| <b>Total</b>          | <b>50,967728</b> | <b>47.9%</b> | <b>54910</b> | <b>55.5%</b> | <b>47,543051.1</b> | <b>59.2%</b> | <b>50241</b> | <b>64.5%</b> |

<sup>a</sup> Companies are listed according to the total value of TOVs in both years

<sup>b</sup> Empty cells mean that company was not in database that year

<sup>c</sup> N/A means company did not provide information on any TOV in aggregate and therefore the disclosure rate cannot be calculated.

# BMJ Open

## Disclosure of payments by pharmaceutical companies to healthcare professionals in the United Kingdom: analysis of the Association of the British Pharmaceutical Industry's Disclosure UK database, 2015 and 2016 cohorts

|                                 |                                                                                                          |
|---------------------------------|----------------------------------------------------------------------------------------------------------|
| Journal:                        | <i>BMJ Open</i>                                                                                          |
| Manuscript ID                   | bmjopen-2018-023094.R1                                                                                   |
| Article Type:                   | Research                                                                                                 |
| Date Submitted by the Author:   | 01-Aug-2018                                                                                              |
| Complete List of Authors:       | Mulinari, Shai; Lunds Universitet, Sociology<br>Ozieranski, Piotr; University of Bath                    |
| <b>Primary Subject Heading</b>: | Health policy                                                                                            |
| Secondary Subject Heading:      | Health policy                                                                                            |
| Keywords:                       | Transparency, Pharmaceutical Industry, Conflict of Interest, Disclosure, United Kingdom, Self-regulation |
|                                 |                                                                                                          |

SCHOLARONE™  
Manuscripts

1  
2  
3 **Disclosure of payments by pharmaceutical companies to healthcare professionals in the**  
4 **United Kingdom: analysis of the Association of the British Pharmaceutical Industry's**  
5 **Disclosure UK database, 2015 and 2016 cohorts**  
6  
7

8  
9 **Authors:** Shai Mulinari<sup>1\*</sup>, Piotr Ozieranski<sup>2</sup>  
10

11  
12  
13 <sup>1</sup> Department of Sociology, Faculty of Social Sciences, Lund University, Sweden  
14

15 <sup>2</sup> Department of Social and Policy Sciences, University of Bath, Bath, UK  
16  
17

18  
19 **\*To whom correspondence should be addressed:**  
20

21 Department of Sociology, Lund University, Sweden  
22

23 Box 117, 221 00 Lund, Sweden  
24

25  
26 E-mail: [shai.mulinari@soc.lu.se](mailto:shai.mulinari@soc.lu.se) (preferred for communication)  
27

28 Phone: +46462223466 (work); +46737343316 (cellphone)  
29  
30

31  
32 **Word count:** 4464  
33  
34  
35  
36  
37  
38  
39  
40  
41  
42  
43  
44  
45  
46  
47  
48  
49  
50  
51  
52  
53  
54  
55  
56  
57  
58  
59  
60

## Abstract

**Objectives:** To analyse the section of Disclosure UK that pertains to healthcare professionals (HCPs) in order to provide insight into the database's structure and content and suggest ways to improve its transparency.

**Design and Participants:** Cohort study of drug companies and HCPs in the 2015 and 2016 versions of Disclosure UK.

**Results:** Companies report transfers of value (TOVs) to named HCPs or, where an HCP declines to consent, in aggregate. Only a limited number of variables describe the recipient HCP and the TOV, precluding refined analyses. In 2015, 107 companies reported 54,910 TOVs worth £50,967,728. In 2016, 109 companies reported TOVs but spending decreased by 7.3%. The spending was concentrated: the top-10 spenders reported about 50% of the total value, with consultancy-related payments comprising over 70%, and the rest being costs for events. In 2015, 55.5% (30,478) of TOVs worth £24,428,619 (47.9%) were disclosed at the individual HCP level, increasing to 64.5% (32,407) and £28,145,091 (59.2%) in 2016. Despite increased individual-level disclosure in 2016, the median number of TOVs reported by each company at the individual level was only 57.7%, with 25% of companies reporting less than 38.6%. We found little agreement (62%-48% in 2015 and 46%-30% in 2016) between HCP consent rates that we calculated based on information in the database and those provided by companies.

## Conclusions

Key deficiencies in Disclosure UK include: insufficient information on payments and recipients, a relatively low HCP consent rate for individual-level disclosure, differences in consent rates across companies and payment types, and reporting ambiguities or inconsistencies. We employ these findings to develop recommendations for improving transparency, including an easily interpretable consent rate statistic that allows for comparison across years, firms, and countries. If deficiencies remain unresolved, the UK should consider introducing legislation requiring mandatory disclosure to allow for adequate tracking of industry payments.

## Article summary

### *Strengths and limitations of this study*

- Thus far, there have been no studies analysing publically available pharmaceutical industry disclosure databases in any European country, including the UK.
- Our analysis was based on the full Disclosure UK dataset for HCP payments for two years.
- Our calculations of overall payment sums and HCP consent rates are consistent with what was reported by the Association of the British Pharmaceutical Industry, which corroborates our methodology.
- A limitation is that we had no way of checking the accuracy of the data reported by companies.
- Our study does not consider differences in companies' approaches to interpreting and reporting of some data elements and which can invalidate direct comparison of the value of payments between companies.

**Keywords:** Transparency, Pharmaceutical Industry, Conflict of Interest, Disclosure, United Kingdom, Self-regulation

## Introduction

Collaboration between pharmaceutical companies and healthcare professionals (HCPs) is seen by many as vital for boosting innovation and efficiency in healthcare. However, HCPs' commercial links create the potential for conflicts of interest<sup>1</sup> that may bias medical research,<sup>2</sup> treatment decisions<sup>3</sup> and lead to wasteful public spending.<sup>4</sup> In recent years, a key way of addressing these concerns<sup>5</sup> – and protecting the transparency and accountability of healthcare policy and practice<sup>6</sup> – is by enhancing the transparency in the industry's financial support to HCPs.<sup>7</sup> By far the most recognised transparency initiative globally is the US Government's Physician Payment "Sunshine Act", requiring pharmaceutical and medical device companies to report payments to named doctors and teaching hospitals in a publicly accessible database.<sup>5</sup> A few European countries, including France, Portugal and Latvia, have enacted similar "transparency acts".<sup>7</sup> Nevertheless, rather than state legislation, an approach preferred in most European countries has been industry self-regulation, based on the European Federation of Pharmaceutical Industries and Associations' (EFPIA's) guidelines requiring companies to report payments or benefits in kind – also known as transfers of value (TOVs) – made to HCPs and healthcare organisations.<sup>8</sup>

The UK is a key case illustrating this tendency. Consistent with its established history of pharmaceutical industry self-regulation,<sup>9 10</sup> the Association of the British Pharmaceutical Industry (ABPI) implemented the EFPIA guidelines in 2016 by establishing Disclosure UK, a freely accessible and annually updated online industry payments database.<sup>11</sup> All ABPI members and any other pharmaceutical company that follows ABPI's Code of Practice for the Pharmaceutical Industry are required to report payments; in total, over one hundred companies. In this paper, we analyse the part of Disclosure UK comprising payments to HCPs, including (1) events registrations and travel and accommodation, and (2) fees and expenses for consultancy and services.

Although the launch of the database received considerable attention and commentary,<sup>12-15</sup> it has so far eluded in-depth research scrutiny. One key area of concern has been that, unlike the legislative approaches introducing mandatory disclosure, the self-regulatory approach has an "opt-out" clause whereby an HCP can choose not to have their name reported in line with data protection legislation.<sup>8</sup> Preliminary analysis conducted on behalf of the ABPI revealed that this option allowed only 55% of TOVs made in 2015 to be linked to named HCPs,<sup>16</sup> increasing to 65% in 2016.<sup>17</sup> This preliminary analysis did not consider, however, differences



1  
2  
3 in companies' ability to secure consent, even though information on cross-company  
4 differences in HCP consent rates might offer clues on how to enhance transparency, for  
5 example by pointing to effective or ineffective practices for securing consent.  
6  
7

8  
9 In addition, early analyses indicate that not only do many HCPs decline to disclose the  
10 payments they received,<sup>12 13</sup> but also that there are discrepancies between companies in how  
11 they record and report some data.<sup>16</sup> Thus, coinciding with the release of the first Disclosure  
12 UK database in June 2016, the ABPI announced an estimated 70% HCP consent rate, but six  
13 months later this figure was revised down to 55% after the ABPI had identified differences  
14 between companies in how they recorded consent rates.<sup>16</sup> The fact that no outside analysis  
15 pointed to this major inaccuracy in a key disclosure statistic underscores the need for in-  
16 depth, independent analyses of Disclosure UK that would complement a rapidly growing  
17 body of research on US data released under the provisions of the "Sunshine Act".<sup>3 18-24</sup>  
18  
19  
20  
21  
22  
23  
24

25 The aim of this paper is, therefore, to carry out an analysis of Disclosure UK that goes beyond  
26 the preliminary analyses and commentary to establish a more comprehensive picture of the  
27 database, and on this basis suggests ways to enhance its transparency. Specifically, we sought  
28 to (1) describe the structure of Disclosure UK, including information and variables available;  
29 (2) calculate key statistics, e.g., payment sums and HCP consent rates for individual-level  
30 disclosure; and (3) explore the variation across companies in spending and consent rates, as  
31 well as possible ambiguities and inconsistencies in the way companies report this information.  
32 For all purposes, we analysed the 2015 and 2016 database versions that were accessible in  
33 July 2017.  
34  
35  
36  
37  
38  
39  
40  
41  
42

## 43 **Methods**

### 44 *Disclosure UK database*

45  
46 Companies report TOVs on a yearly basis in Disclosure UK.<sup>11</sup> Data for 2015 was released in  
47 June 2016, and the 2016 data was released in June 2017. During the course of our study we  
48 realised that the databases were occasionally updated with some new information without  
49 notice. We decided to work with the databases downloaded in July 2017 to ensure  
50 comparability with results published on behalf of the ABPI.<sup>16 17</sup> From the 2015 database we  
51  
52  
53  
54  
55  
56  
57  
58  
59  
60

1  
2  
3 excluded payments reported by Sigma-Tau because Baxalta also reported these same  
4 payments due to its acquisition of Sigma-Tau Pharma Ltd.<sup>25</sup>  
5  
6

### 7 8 ***Structure of Disclosure UK***

9 We used a qualitative, inductive methodology to characterise Disclosure UK. We sought to  
10 identify the key elements in the database, such as the variables describing TOVs and HCPs,  
11 by running a number of simple analyses to familiarise ourselves with the database. We also  
12 extracted and reviewed definitions from the EFPIA Disclosure code,<sup>8</sup> the ABPI Code of  
13 Practice,<sup>26</sup> and the Disclosure Template that companies use when reporting payments.<sup>27</sup>  
14  
15  
16  
17

### 18 19 ***TOV numbers, monetary value and HCP consent rates***

20 Companies report TOVs to named HCPs or, where an HCP does not grant consent, in  
21 aggregate. Notably, any TOV entry in the database can represent several payments to the  
22 same HCPs for a certain TOV *type* (registration fees, consultancy fees etc.) that have  
23 happened during a given year and then have been totalled by the paying company.<sup>27</sup> For the  
24 payments disclosed in aggregate, companies report the number and aggregate monetary value  
25 of the TOVs by their type. We used the aggregate and individual-level TOV data to compute  
26 the total numbers and the monetary value of TOVs. Using descriptive statistics, we also  
27 calculated the distribution of the monetary value of TOVs that were disclosed at the  
28 individual level. Because this TOV data was not normally distributed we report the minimum  
29 and maximum, median, interquartile range (IQR), and the 99% percentile value.  
30  
31  
32  
33  
34  
35  
36  
37

38 We also used the aggregate and individual-level TOV data to calculate the overall HCP  
39 consent rate across all TOV types and the rates per TOV type (e.g., consultancy fees), both in  
40 terms of the number and the monetary value. We calculated differences between consent rates  
41 in terms of the number and monetary value of TOVs in order to assess if there was a  
42 relationship between the value of TOVs and HCP disclosure consent.  
43  
44  
45  
46  
47

### 48 49 ***Company-level spending and HCP consent rates***

50 We applied the above methodology on a per company basis to compute the number and  
51 monetary value of TOVs made by each company as well as each company's consent rates.  
52 Ten out of 107 companies in the 2015 database did not provide information on TOVs in  
53 aggregate, and for 2016 this was of 13 out of 109. Because we cannot know if this meant  
54 these companies failed to report payments or, alternatively, they had 100% HCP consent and  
55  
56  
57  
58  
59  
60

1  
2  
3 therefore had nothing to report in aggregate, we excluded them from this part of the analysis.  
4 We used descriptive statistics to depict the distribution of HCP consent rates across remaining  
5 97 and 96 companies in 2015 and 2016, respectively.  
6  
7

### 9 ***Agreement between author-calculated and company-reported HCP consent rates***

10 In the database, companies should report the number of TOV recipients disclosed in aggregate  
11 for each TOV type as per cent of all TOV recipients (i.e., reported at individual level and  
12 aggregate) for that TOV type (see Results). However, the ABPI has reported that although the  
13 majority of companies in the 2015 edition of the database correctly understood the  
14 instructions on how to calculate this consent rate statistic, some companies appear to have  
15 misunderstood the instructions and instead provided the number of recipients disclosed in  
16 aggregate for each TOV type as per cent of *all* recipients that received payments from the  
17 company irrespective of TOV type.<sup>16</sup> To gain further clarity on this matter, and to see whether  
18 inconsistencies occurred in the 2016 database, we compared the consent rates that we had  
19 calculated for each company (see above) with the rates directly reported by each company.  
20 Notably, because companies report consent rates for the number but not monetary value of  
21 TOVs we were restricted to comparing consent rates only for the former. Similarly, because  
22 companies report consent rates per TOV type, rather than across all TOV types, we compared  
23 consent rates on a TOV type basis.  
24  
25  
26  
27  
28  
29  
30  
31  
32  
33  
34

35 For this analysis we excluded companies that did not submit aggregate payments reports  
36 (n=10 in 2015; n=13 in 2016). We also excluded cases in which companies had submitted  
37 aggregate payments reports but had left the cell empty in the database that were to contain the  
38 consent rate statistic for a certain TOV type (n=83 in 2015 and n=69 in 2016) since it is  
39 impossible to ascertain whether an empty cell indicates that a company simply failed to report  
40 (i.e., a missing value), or that all payments of this TOV type were disclosed at the individual  
41 level, or that no payments were made at all of this TOV type. We defined any difference  
42 between author-calculated and company-reported consent rates greater than one percentage  
43 point as discordant in order to exclude differences occurring due to rounding. We calculated  
44 the percentage of concordant pairs and used descriptive statistics to analyse disparities  
45 between the computed consent rates.  
46  
47  
48  
49  
50  
51  
52  
53

### 54 ***Patient involvement***

55  
56 No involvement  
57  
58  
59  
60

## Results

### *Disclosure UK definitions and variables*

The disclosure database includes payments to a large spectrum of HCPs, including not only medical doctors but also, among others, pharmacists, nurses, and even individuals who might not be HCPs such as NHS managers (in ABPI documents<sup>26</sup> the latter group is referred to as Other Relevant Decision Makers, or ORDMs, but in the database, and therefore in this study, they are counted as HCPs).

Appendix Tables 1 and 2 summarise the definitions and variables in Disclosure UK relevant to HCPs. Consistent with the EFPIA reporting standard, two higher-level TOV *categories* are used in Disclosure UK: “Contribution to costs for events” and “Fees for services and consultancy”, which are each split into two lower-level TOV *types*: “Registration fees” and “Travel & Accommodation” for events, and “Fees” and “Related expenses agreed in the fee for services and consultancy contract”, respectively.

Each company aggregates its yearly payments at the level of individual HCP and TOV type. For example, if a company makes two “Registration fees” payments to the same HCP the payments are registered as one “Registration fees” TOV. However, if the company makes one “Registration fees” and one “Travel & Accommodation” payment the payments are registered separately. A corollary to this is that many HCPs have several TOV records in the database either because they have received payments of different TOV types from the same company and/or because they have received payments from more than one company. An important implication is that the number of TOV records is greater than the number of HCPs in the database.

Companies are expected report individual-level data, including the name, title, city and principal practice address of each TOV recipient, in addition to the monetary value of the TOV (Appendix Table 2). Payments to HCPs who do not consent to the publication of individual-level data are reported on an aggregate basis by each company, using the four lower-level TOV types (see Table 1). For such aggregate reporting, each company shall specify in the database: (1) the total amount attributable to such recipients; (2) the number of recipients in the aggregate disclosure, and (3) the number of recipients disclosed in aggregate as percent of all recipients. For example, if a company paid ten HCPs £100 each to cover their

1  
2  
3 registration fees for events, but only received consent to publish individual-level data from  
4 five, the company should report in the aggregate for “Registration fees”: (1) £500; (2) five  
5 recipients, and (3) 50%.  
6  
7

8  
9 The database does not allow for calculating the number of HCPs that received payments in a  
10 particular year. This is because in the aggregate disclosure, companies report the number of  
11 recipients per TOV type, rather than across all TOV types. As some HCPs may receive TOVs  
12 of different types from the same company, they will be counted several times. Similarly,  
13 HCPs receiving payments from multiple companies will also be counted several times in the  
14 aggregate.  
15  
16  
17  
18

### 19 *Number and value of payments in Disclosure UK*

20  
21 In 2015, 107 companies reported a total of 54,910 TOVs worth £50,967,728 (Table 1). In  
22 2016, two more companies reported TOVs but spending decreased by over £3,4 million (-  
23 7.3%; inflation-adjusted), and the number of TOVs also decreased by 8.5%. In both years  
24 roughly 35% of the number of TOVs were consultancy fees but money-wise they  
25 corresponded to roughly 60%, reflecting the on average higher value of consultancy fee  
26 TOVs. Conversely, approximately 35% of the number of TOVs covered costs for travel and  
27 accommodation at events but they corresponded to roughly 20% of the total spending,  
28 reflecting the on average smaller size of such TOVs.  
29  
30  
31  
32  
33  
34  
35  
36

37 **Table 1. Transfers of value to UK healthcare professionals in 2015 and 2016**

|                    |                           | 2015          |            |                   |            | 2016          |            |                   |            | $\Delta N$  | $\Delta \text{£}^a$ |
|--------------------|---------------------------|---------------|------------|-------------------|------------|---------------|------------|-------------------|------------|-------------|---------------------|
|                    |                           | N             | %          | £                 | %          | N             | %          | £                 | %          | %           | %                   |
| <b>Events</b>      | <b>Registration fees</b>  | 7,877         | 14.3       | 3,445,579         | 6.8        | 7,441         | 14.8       | 3,293,209         | 6.9        | -5.5        | -5.1                |
|                    | <b>Travel &amp; Accom</b> | 19,138        | 34.9       | 10,692,849        | 21.0       | 17,445        | 34.7       | 9,856,619         | 20.7       | -8.8        | -8.5                |
| <b>Consultancy</b> | <b>Fees</b>               | 19,020        | 34.6       | 30,396,315        | 59.6       | 16,606        | 33.1       | 28,698,492        | 60.4       | -12.7       | -6.2                |
|                    | <b>Expenses</b>           | 8,875         | 16.2       | 6,432,985         | 12.6       | 8,750         | 17.4       | 5,699,934         | 12.0       | -1.4        | -12.0               |
| <b>Total</b>       |                           | <b>54,910</b> | <b>100</b> | <b>50,967,728</b> | <b>100</b> | <b>50,242</b> | <b>100</b> | <b>47,548,254</b> | <b>100</b> | <b>-8.5</b> | <b>-7.3</b>         |

38  
39  
40  
41  
42  
43  
44  
45  
46  
47 <sup>a</sup>Inflation adjusted: +1.7% between 2015 and 2016.

48  
49 In monetary terms, the largest decrease between 2015 and 2016 was seen with consultancy  
50 expenses (-12.0%; inflation-adjusted). This decrease was accompanied by only a minor  
51 decrease in the number of consultancy expenses TOVs (-1.4%), suggesting that the decrease  
52 in the value of payments was due to fewer larger-size payments in 2016. Conversely, there  
53 was a moderate decrease in the value of consultancy fee payments (-6.2%; inflation-adjusted),  
54  
55  
56  
57  
58

but this was accompanied by a greater decrease in the number of consultancy fees TOVs (-12.7%), suggesting that this decrease was associated with fewer smaller-size payments.

### *Variation in spending across companies*

For both years a small number of companies concentrated a large part of the TOVs (Appendix Table 3). In 2015 and 2016, the top-10, -20 and -50 spending companies reported 48.2% and 49.9%, 71.8% and 70.8%, and 93.5% and 92.3% of the spending, respectively. The biggest spender in 2015 was AstraZenca (6.9%; £3,535,413), followed by Bayer (6.2%, £3,159,752) and Merck-Sharp & Dohme (6.0%; £3,076,958). In 2016, Bayer (7.0%; £3,308,421), Pfizer (6.9%; £3,259,315) and Novo Nordisk (5.3%; £2,517,088) were on the top-3 list, and with AstraZenca and Merck-Sharp & Dohme now on fourth (5.2%; £2,465,100) and eighth (4.3%; £2,031,188) place. The median number of TOVs reported per company in 2015 was 187 (min 1; max 3,521; IQR 580.5) and median company spending in 2015 was £141,895 (min £266; max £3,535,413; IQR £444,448). The median number of TOVs reported per company in 2016 was 172 (min 2; max 3,409; IQR 482), and median company spending was £147,490 (min £2,181; max £3,308,421; IQR £410,873), i.e., comparable to 2015.

### *HCP consent rates for individual-level disclosure*

For 2015 we established that 55.5% (30,478) of all TOVs worth £24,428,619 (47.9%) were disclosed at the individual level (Table 2). Regardless of TOV type, HCPs consented to disclose around 55% of the number of TOVs at the individual level, but in monies there was considerable variation in consent rates. In particular, the consent rate for consultancy TOV types was higher in number of TOVs (56.9% and 53.6%) than in monetary terms (47.9% and 38.4%).

**Table 2. Healthcare professional consent rates for individual-level disclosure of transfers of value in 2015 and 2016**

|                    |                           | 2015             |                  | 2016             |                  |
|--------------------|---------------------------|------------------|------------------|------------------|------------------|
|                    |                           | % N <sup>a</sup> | % £ <sup>b</sup> | % N <sup>a</sup> | % £ <sup>b</sup> |
| <b>Events</b>      | <b>Registration fees</b>  | 54.6             | 56.0             | 64.4             | 64.1             |
|                    | <b>Travel &amp; Accom</b> | 55.4             | 51.3             | 64.6             | 64.7             |
| <b>Consultancy</b> | <b>Fees</b>               | 56.9             | 47.9             | 66.4             | 58.2             |
|                    | <b>Expenses</b>           | 53.6             | 38.4             | 60.9             | 51.9             |
| <b>Total</b>       |                           | <b>55.5</b>      | <b>47.9</b>      | <b>64.5</b>      | <b>59.2</b>      |

<sup>a</sup> Consent rate for the number of TOVs

<sup>b</sup> Consent disclosure rate for monetary value of TOVs

In 2016, the consent rate had increased to 64.5% (32,407) of all TOVs worth £28,145,091 (59.2%). However, despite the improved consent rate, the difference between consent rates for consultancies remained (66.4% and 60.9% for numbers of TOVs vs. 58.2% and 51.9% in monetary value).

### *Pattern of individual-level disclosed TOVs*

Table 3 shows the distribution of individual-level disclosed TOVs. Consultancy fees were more often larger than other TOVs types, and some of these payments were substantial: the top percentile included payments equal or larger than £11,012.3 (in 2015) and £12,857.8 (in 2016). However, there were some large payments associated with events. For example, for travel & accommodation, the top percentile included payments equal or larger than £3,729 (in 2015) and £3,781.6 (in 2016).

**Table 3. Distribution of transfer of value sums (£) disclosed at the individual level**

|                    |                           | 2015           |        |       |          |          | 2016 |        |       |          |          |
|--------------------|---------------------------|----------------|--------|-------|----------|----------|------|--------|-------|----------|----------|
|                    |                           | Min            | Median | IQR   | 99%      | Max      | Min  | Median | IQR   | 99%      | Max      |
| <b>Events</b>      | <b>Registration fees</b>  | 10             | 394.1  | 292.6 | 1,698.9  | 19,836   | 10   | 395    | 306   | 1,515.2  | 4,880    |
|                    | <b>Travel &amp; Accom</b> | 1,5            | 252    | 465   | 3,729    | 22,280   | 1.5  | 289.3  | 535.2 | 3,781.6  | 28,160.1 |
| <b>Consultancy</b> | <b>Fees</b>               | 0 <sup>a</sup> | 750    | 950   | 11,012.3 | 54,700.9 | 14.8 | 750    | 1,100 | 12,857.8 | 81,130.2 |
|                    | <b>Expenses</b>           | 1              | 142.7  | 295.1 | 7,817.1  | 34,223   | 2    | 156.5  | 339.1 | 8,003.1  | 42,942.9 |

<sup>a</sup> Britannia Pharmaceuticals registered this payment and it likely represents a mistake

### *Differences in HCP consent rates across companies*

We found differences across companies in HCP consent rates (Figure 1; Appendix Table 3). In 2015, the median among companies for TOV sums was 47.3%, with 75% of companies reporting more than 72.8% and 25% of companies reporting less than 21.3% at the individual level. This latter group included top-30 spenders like Merck Sharp & Dohme (1.2%), Allergan (12.3%), Bristol-Myers Squibb (20.8%), Napp (20.5%) and Boehringer Ingelheim (21.3%). There were fewer big companies on the other side of the spectrum: Teva (72.4%), Gilead (73.6%) and GlaxoSmithKline (95%). By 2016 consent rates had increased (median 57.7%); still, 25% of companies included in this analysis reported less than 38.6% of the value of payments at the individual level, counting big spenders like Napp (10.5%), Allergan (20.8%), Novo Nordisk (31.7%), and Bayer (34%).



### ***Agreement between author-calculated and company-reported HCP consent rates***

We compared the consent rates for the number of TOVs that we calculated ourselves on the basis of information in the database, on the one hand, and the rates reported directly by companies in the database, on the other. For this analysis, we had to exclude ambiguous cases (n=83 in 2015 and n=69 in 2016) (see Methods). The percent agreement between what we calculated and what companies reported for each TOV type was only 62%-48% in 2015 (Table 4). The agreement was worse in 2016: 46%-30%. In 108 of 143 (76%) (in 2015) and 194 of 197 (98%) (in 2016) of cases of disagreement, companies reported higher consent rates than what we calculated. In some cases, the difference between our calculations and what companies' reported was very large, but in most cases the difference was smaller, albeit substantial (Figure 2).

**Table 4. Percent agreement between author-calculated and company-reported healthcare professional consent rates**

|                    |                           | 2015      |       | 2016      |       |
|--------------------|---------------------------|-----------|-------|-----------|-------|
|                    |                           | Agreement | n/N   | Agreement | n/N   |
| <b>Events</b>      | <b>Registration fees</b>  | 61%       | 40/66 | 46%       | 31/68 |
|                    | <b>Travel &amp; Accom</b> | 54%       | 40/74 | 41%       | 32/80 |
| <b>Consultancy</b> | <b>Fees</b>               | 51%       | 46/91 | 39%       | 36/93 |
|                    | <b>Expenses</b>           | 48%       | 35/73 | 30%       | 24/79 |

### **Discussion**

To the best of our knowledge, this is the first systematic analysis of the Disclosure UK database. Payments to HCPs totalling roughly £51 million and £47.5 million were reported in 2015 and 2016, respectively, concentrating in the hands of several big spenders. Consultancy-related payments comprised more than 70% of the total value, with the rest being costs for events. That the industry over the two-year period paid more than £30 million for events registration and travel and accommodation – which included some sizeable payments – is noteworthy in light of the criticism levied against industry sponsorship of HCPs' conference and events attendance in the past,<sup>28 29</sup> and which has motivated the barring of such sponsorship by the industry trade group in Sweden<sup>7</sup> and at least one major company.<sup>30</sup>

We confirm preliminary analyses conducted on behalf of the ABPI<sup>17</sup> showing a higher consent rate for 2016 in 2015 – from 48% to 59%. Although this increase was taken as



1  
2  
3 evidence of an increased HCP willingness to participate in Disclosure UK,<sup>17</sup> the ABPI  
4 recently announced a drop in HCP consent for 2017 below 2015 levels, which the trade group  
5 attributed to the new Europe-wide General Data Protection Regulation (GDPR).<sup>31</sup>  
6 Significantly, however, our analysis goes further than these preliminary analyses by  
7 highlighting differences in consent rates across payment categories and companies. Regarding  
8 differences across payment categories, analysis at the level payment sums showed that HCPs  
9 were less likely to consent to disclosure of consultancy payments than events payments.  
10 Furthermore, HCPs who received larger consultancy payments appeared less likely to consent  
11 to disclosure since consent rates were lower for payment sums than for the number of  
12 transfers. Regarding variation across companies, a key finding is that some big spenders, like  
13 Bayer and Novo Nordisk, reported relatively few payments at the HCP individual level whilst  
14 others, such as GlaxoSmithKline, reported almost everything at the individual level. As  
15 debates about HCP willingness to participate in Disclosure UK have focused mostly on HCP  
16 behaviour and motivation<sup>32 33</sup> our finding of major company variation is important because it  
17 shifts the focus to company characteristics, especially policies for collecting consent from  
18 HCPs, which in turn may be associated with more general corporate cultures, as another set of  
19 likely determinants of consent. Notably, companies that fail to live up to industry's stated  
20 commitment to Disclosure UK could be investigated and sanctioned by the Prescription  
21 Medicines Code of Practice Authority (PMCPA), the industry self-regulatory body that  
22 administers the ABPI Code of Practice.<sup>9 10</sup> Although a lower than average HCP consent rate  
23 does not prove company misconduct the fact that, for example, Merck Sharpe & Dohme  
24 reported that fewer than 2% of collaborating HCPs consented to individual-level disclosure in  
25 2015 suggests that the PMCPA has reason to investigate whether some companies have  
26 eschewed disclosure.  
27  
28  
29  
30  
31  
32  
33  
34  
35  
36  
37  
38  
39  
40  
41  
42

43 The launch of Disclosure UK was heralded as a breakthrough in pharmaceutical industry  
44 transparency.<sup>34</sup> Although the database does represent a step towards enhanced transparency,  
45 our study highlights deficiencies that undermine its usefulness for understanding industry  
46 payments to HCPs and associated impact on healthcare delivery. First, and consistent with  
47 EFPIA guidelines, the database only contains aggregate data on R&D payments and it omits  
48 HCPs' ownership or investment interest – two areas highlighted as important by research on  
49 industry payments in the US.<sup>35</sup> Second, the fact that HCPs can opt-out from individual-level  
50 disclosure, together with the fact that consent rates vary substantially between companies,  
51 means that, due to the risk of participation bias, it is precarious to investigate the association  
52  
53  
54  
55  
56  
57  
58  
59  
60

1  
2  
3 between receiving payments and HCP behaviour (e.g. prescribing) or characteristics (e.g.  
4 gender or speciality), as has been done extensively with US data.<sup>3 18-24</sup> A third limitation is the  
5 lack of information on a number of characteristics that provide relevant details regarding the  
6 payment. For example, a recent study using information in the US Open Payments Database  
7 on the products connected to payments showed that firms' invested great sums to promote  
8 drugs for which more innovative, effective, safer and cheaper alternatives existed.<sup>36</sup>  
9 Unfortunately, this is a kind of analysis not possible to do with UK data because companies  
10 are not asked to disclose information on the products in relation to which the payment was  
11 made.  
12  
13  
14  
15  
16  
17

18  
19 Another aspect of Disclosure UK in need of urgent improvement relates to how companies  
20 report data on payments to non-consenting HCPs. We found that companies regularly left  
21 cells empty in the database where they should inform on the HCP consent rate. We  
22 recommend companies should never leave cells empty as this creates ambiguity. Another  
23 problem concerning the present consent rate reporting standard – and which applies to all  
24 countries relying on the EFPIA-based self-regulatory model and reporting standard – is that,  
25 arguably, there are more relevant and easily interpretable data elements that companies could  
26 report other than the number of HCP recipients disclosed in aggregate as the percent of all  
27 recipients for each TOV type. Intuitively, one would expect companies to summarise their  
28 HCP consent rates in total (i.e., what is the company's overall consent rate?) and for each  
29 TOV type separately (i.e. what is the company's consent rate for, for example, consultancy  
30 fees?). Companies should provide this information both in terms of the number and value of  
31 TOVs – currently they only provide rates calculated for the number of TOVs. Should our  
32 reporting suggestions be adopted this would allow for easy comparison across years, firms  
33 and countries. Furthermore, it might offer a simple mechanism for increasing individual-level  
34 disclosure because publicising consent rates in a consistent and interpretable format is likely  
35 to put pressure on companies to improve their figures to avoid damage to their reputation for  
36 transparency.  
37  
38  
39  
40  
41  
42  
43  
44  
45  
46  
47  
48

49 That the current consent rate reporting standard is unintuitive is underlined by the  
50 inconsistencies, and possible inaccuracies, in companies' reporting, and which – despite being  
51 highlighted by the ABPI – continued into the 2016 version of the database. Thus the  
52 comparison between our author-calculated and the company-reported consent rates showed  
53 that in some cases the difference was very large, more consistent with the idea that some  
54  
55  
56  
57  
58  
59  
60

1  
2  
3 companies had altogether misunderstood how to compute consent rates. In most cases,  
4 however, the difference was smaller, albeit substantial, which makes it less likely to be due to  
5 confusion about how to compute consent rates. The existence of ambiguity or inconsistency  
6 points to a broader issue of limited transparency and data quality, and possibly lack of  
7 oversight, with implications for other countries too – and especially for European countries  
8 that lack a central and analysable registry for payments,<sup>7</sup> and that therefore rely even more on  
9 accurate and comparable reporting by companies as there is limited possibilities to  
10 independently analyse data. In the event that the ABPI is unable to swiftly resolve the various  
11 problems of limited transparency and data quality in Disclosure UK our study has revealed,  
12 we suggest – like others<sup>37 38</sup> – that the UK government should consider introducing legislation  
13 requiring disclosure modelled on the US Open Payments Database.  
14  
15  
16  
17  
18  
19  
20  
21

### 22 ***Strength and limitations***

23 The main strengths of this paper are that it is based on the full dataset for two years and that  
24 calculations are consistent with the ABPI's, which corroborates our methodology. The main  
25 limitation is that we have no way of checking the accuracy of the data. Furthermore,  
26 transparency requirements do not apply to manufacturers of generics and over-the-counter  
27 medicines and exclude some payments such as food and drinks;<sup>7</sup> thus, our analysis likely  
28 underestimates the true extent of payments.<sup>39</sup> For analyses of company-level HCP consent  
29 rates we excluded cases that were ambiguous. However, including such cases would not  
30 change conclusions that there is major company-variation in consent rates or that there was  
31 limited agreement between author-calculated and company-reported consent rates. Also, we  
32 did not take into account differences in companies' interpretation and reporting of some data  
33 elements that are detailed in the methodological note that each company provides.<sup>40 41</sup> Of  
34 relevance to consent rates is the issue of how companies deal with cases where HCPs  
35 consented to the individual-level disclosure of some TOVs but refused others. The vast  
36 majority of companies that specify a rule for this state that they disclose all TOVs to those  
37 recipients in the aggregate section, i.e., they do not allow for partial disclosure. However, four  
38 companies in 2015<sup>40</sup> and three in 2016<sup>41</sup> reported in their methodological notes that, at least in  
39 some circumstances, partial disclosure was allowed, meaning that an individual may be  
40 counted in both in the individually-named and aggregate sections, and it is unclear if this  
41 influences the consent rates calculated by these companies. Furthermore, some companies  
42 choose to report payments with and some without VAT and other taxes (e.g., income tax and  
43 national insurance), and some companies' procedures vary according to the type or recipient  
44  
45  
46  
47  
48  
49  
50  
51  
52  
53  
54  
55  
56  
57  
58  
59  
60

1  
2  
3 of the payment. Comparison of the value of TOVs made by two companies may also be  
4 distorted by the fact there is variation among companies with regard to whether they consider  
5 TOVs to HCP members of their own staff to be within the scope of the disclosure, and in how  
6 they classify for the purposes of disclosure (i.e., as HCPs or healthcare organisation) self-  
7 incorporated HCPs or companies owned and/or run by an HCP. Given the complexity, these  
8 methodological matters should become the subject of a separate study. Finally, we did not  
9 include payments for R&D that are reported in aggregate by companies. Future studies should  
10 investigate R&D payments, as well as the payments to healthcare organisations, and may also  
11 choose to extend the analysis to other European countries' databases where possible, for  
12 example, to explore differences in HCP consent rates across countries on a company-per-  
13 company basis.  
14  
15  
16  
17  
18  
19  
20  
21  
22  
23  
24  
25  
26  
27  
28  
29  
30  
31  
32  
33  
34  
35  
36  
37  
38  
39  
40  
41  
42  
43  
44  
45  
46  
47  
48  
49  
50  
51  
52  
53  
54  
55  
56  
57  
58  
59  
60

## References

1. Field MJ, Lo B. Conflict of interest in medical research, education, and practice: National Academies Press 2009.
2. Lundh A, Sismondo S, Lexchin J, et al. Industry sponsorship and research outcome. *Cochrane Database Syst Rev* 2012;12(12)
3. Yeh JS, Franklin JM, Avorn J, et al. Association of Industry Payments to Physicians With the Prescribing of Brand-name Statins in Massachusetts. *JAMA Intern Med* 2016;176(6):763-68.
4. Stamatakis E, Weiler R, Ioannidis J. Undue industry influences that distort healthcare research, strategy, expenditure and practice: a review. *Eur J Clin Invest* 2013;43(5):469-75.
5. Dunn AG, Coiera E, Mandl KD, et al. Conflict of interest disclosure in biomedical research: a review of current practices, biases, and the role of public registries in improving transparency. *Res Integr Peer Rev* 2016;1(1):1-8. doi: 10.1186/s41073-016-0006-7
6. Grundy Q, Habibi R, Shnier A, et al. Decoding disclosure: Comparing conflict of interest policy among the United States, France, and Australia. *Health Policy* 2018; 122(5):509-518. doi: 10.1016/j.healthpol.2018.03.015.
7. Fabbri A, Santos A, Mezinska S, et al. Sunshine Policies and Murky Shadows in Europe: Disclosure of Pharmaceutical Industry Payments to Health Professionals in Nine European Countries. *Int J Health Policy Manag* 2018; E-pub ahead of print
8. European Federation of Pharmaceutical Industries and Associations (EFPIA). EFPIA HCP/HCO DISCLOSURE CODE 2014 [Available from: <https://www.efpia.eu/media/25837/efpia-disclosure-code.pdf>.]
9. Zetterqvist AV, Merlo J, Mulinari S. Complaints, complainants, and rulings regarding drug promotion in the United Kingdom and Sweden 2004–2012: A quantitative and qualitative study of pharmaceutical Industry self-regulation. *PLoS Med* 2015;12(2):e1001785.
10. Vilhelmsson A, Davis C, Mulinari S. Pharmaceutical industry off-label promotion and self-regulation: a document analysis of off-label promotion rulings by the United Kingdom Prescription Medicines Code of Practice Authority 2003–2012. *PLoS Med* 2016;13(1):e1001945.
11. Association of the British Pharmaceutical Industry (ABPI). Disclosure UK. [Available from: <https://www.abpi.org.uk/ethics/ethical-responsibility/disclosure-uk/>]
12. Kmietowicz Z. Disclosure UK website gives “illusion of transparency,” says Goldacre. *BMJ* 2016;354 doi: 10.1136/bmj.i3760
13. Hawkes N. Doctors getting biggest payments from drug companies don’t declare them on new website. *BMJ* 2016;354 doi: 10.1136/bmj.i3679
14. Adlington K, Godlee F. Disclosure UK: transparency should no longer be an optional extra. *BMJ* 2016;354 doi: 10.1136/bmj.i3730
15. McCartney M. Optional disclosure of payments is pointless. *BMJ* 2016;354 doi: 10.1136/bmj.i3692
16. Association of the British Pharmaceutical Industry (ABPI). Pharmaceutical Industry Disclosure UK: six month figures show increase in research spend and lower than estimated number of healthcare professionals disclosing payments from industry, 27 Mar 2017. [Available from: <https://www.abpi.org.uk/media-centre/news/2017/march/pharmaceutical-industry-disclosure-uk-six-month-figures/>]
17. Association of the British Pharmaceutical Industry (ABPI). Significant increase in healthcare professionals disclosing partnerships with the pharmaceutical industry, 30 Jun 2017. [Available from: <https://www.abpi.org.uk/media->

- [centre/news/2017/june/significant-increase-in-healthcare-professionals-disclosing-partnerships-with-the-pharmaceutical-industry/](#)
18. Taylor SC, Huecker JB, Gordon MO, et al. Physician-industry interactions and anti-vascular endothelial growth factor use among US ophthalmologists. *JAMA Ophthalmol* 2016;134(8):897-903.
  19. DeJong C, Aguilar T, Tseng C-W, et al. Pharmaceutical industry-sponsored meals and physician prescribing patterns for Medicare beneficiaries. *JAMA Intern Med* 2016;176(8):1114-10.
  20. Fleischman W, Agrawal S, King M, et al. Association between payments from manufacturers of pharmaceuticals to physicians and regional prescribing: cross sectional ecological study. *BMJ* 2016;354:i4189.
  21. Perlis RH, Perlis CS. Physician Payments from Industry Are Associated with Greater Medicare Part D Prescribing Costs. *PLOS ONE* 2016;11(5):e0155474. doi: 10.1371/journal.pone.0155474
  22. Eloy JA, Bobian M, Svider PF, et al. Association of Gender With Financial Relationships Between Industry and Academic Otolaryngologists. *JAMA Otolaryngol Head Neck Surg* 2017;143(8):796-802. doi: 10.1001/jamaoto.2017.0276.
  23. Rose SL, Sanghani RM, Schmidt C, et al. Gender Differences in Physicians' Financial Ties to Industry: A Study of National Disclosure Data. *PLOS ONE* 2015;10(6):e0129197. doi: 10.1371/journal.pone.0129197
  24. Marshall DC, Jackson ME, Hattangadi-Gluth JA. Disclosure of industry payments to physicians: an epidemiologic analysis of early data from the open payments program. *Mayo Clin Proc* 2016;91(1):84-96. doi: 10.1016/j.mayocp.2015.10.016.
  25. Baxalta. Baxalta Disclosure Methodology Summary – 2015 Payments, 2016. [Available from: <https://www.shire.com/-/media/shire/shireglobal/shirecom/pdf/files/efpia/2015/baxalta-methodology-uk-english.pdf?la=en&hash=EE572FEA5FB91FB3B0553F4AD90716563488FB80>]
  26. Association of the British Pharmaceutical Industry (ABPI). The ABPI Code of Practice for the Pharmaceutical Industry, 2016. [Available from: <http://www.pmcpa.org.uk/theCode/Documents/Code%20of%20Practice%202016%20.pdf>]
  27. Association of the British Pharmaceutical Industry (ABPI). ABPI Disclosure Template, 2014. [Available from: <http://www.pmcpa.org.uk/media/Pages/Disclosure.aspx>]
  28. Robertson J, Moynihan R, Walkom E, et al. Mandatory disclosure of pharmaceutical industry-funded events for health professionals. *PLoS Med* 2009;6(11):e1000128.
  29. Rutledge P, Crookes D, McKinstry B, et al. Do doctors rely on pharmaceutical industry funding to attend conferences and do they perceive that this creates a bias in their drug selection? Results from a questionnaire survey. *Pharmacoepidemiol Drug Saf* 2003;12(8):663-67.
  30. GlaxoSmithKline. Disclosure of payments made to HCPs in the UK, 2016. [Available from: <https://www.gsk.com/en-gb/responsibility/our-behaviour/engaging-with-healthcare-professionals/europe/united-kingdom/>]
  31. Association of the British Pharmaceutical Industry (ABPI). Pharmaceutical industry continues to invest significantly in UK research and development, 29 Jun 2018. [Available from: <https://www.abpi.org.uk/media-centre/news/2018/june/pharmaceutical-industry-continues-to-invest-significantly-in-uk-research-and-development/>]
  32. Torjesen I. GMC says it can't force doctors to disclose payments from drug companies. *BMJ* 2016;354:i3806



- 1
  - 2
  - 3
  - 4
  - 5
  - 6
  - 7
  - 8
  - 9
  - 10
  - 11
  - 12
  - 13
  - 14
  - 15
  - 16
  - 17
  - 18
  - 19
  - 20
  - 21
  - 22
  - 23
  - 24
  - 25
  - 26
  - 27
  - 28
  - 29
  - 30
  - 31
  - 32
  - 33
  - 34
  - 35
  - 36
  - 37
  - 38
  - 39
  - 40
  - 41
  - 42
  - 43
  - 44
  - 45
  - 46
  - 47
  - 48
  - 49
  - 50
  - 51
  - 52
  - 53
  - 54
  - 55
  - 56
  - 57
  - 58
  - 59
  - 60
33. Association of the British Pharmaceutical Industry (ABPI) and NHS England. Joint Letter from ABPI and NHS England about Disclosure, Dec 22 2017 [Available from: <http://www.abpi.org.uk/media/4589/disclosure-uk-letter-22122017.pdf>]
34. Association of the British Pharmaceutical Industry (ABPI). Pharmaceutical industry spends £340.3m on working in partnership with leading UK health experts and organisations to improve patient care, 29 Jun 2016. [Available from: <http://www.abpi.org.uk/media-centre/news/2016/june/pharmaceutical-industry-spends-3403m-on-working-in-partnership>]
35. Agrawal S, Brown D. The Physician Payments Sunshine Act -Two Years of the Open Payments Program. *New Eng J Med* 2016;374(10):906-09.
36. Greenway T, Ross JS. US drug marketing: how does promotion correspond with health value? *BMJ* 2017;357:j1855.
37. Feldman HR, DeVito NJ, et al. A cross-sectional study of all clinicians' conflict of interest disclosures to NHS hospital employers in England 2015-2016. *BMJ Open* 2018;8(3), e019952.
38. Vassar M, Bibens M, Wayant C. Transparency of industry payments needed in clinical practice guidelines *BMJ Evidence-Based Medicine* 2018. doi: 10.1136/bmjebm-2018-111020
39. Fabbri A, Grundy Q, Mintzes B, et al. A cross-sectional analysis of pharmaceutical industry-funded events for health professionals in Australia. *BMJ Open* 2017;7(6) doi: 10.1136/bmjopen-2017-016701
40. RAND Europe and Association of the British Pharmaceutical Industry (ABPI). Disclosure UK: Understanding the data. Guidance notes for analysis of the data, June 2016. [Available from: <http://www.abpi.org.uk/ethics/ethical-responsibility/disclosure-uk/explore-the-data-further/>]
41. RAND Europe and Association of the British Pharmaceutical Industry (ABPI). Disclosure UK: Understanding the data. Guidance notes for analysis of the data, June 2017. [Available from: <http://www.abpi.org.uk/ethics/ethical-responsibility/disclosure-uk/explore-the-data-further/>]

## Figure Legends

**Figure 1.** Box plots show author-calculated healthcare professional consent rates across companies in the 2015 (n=96) and 2016 (n=97) version of Disclosure UK. White depicts the number of TOVs; grey depicts monetary value of TOVs.

**Figure 2.** Box plots show the difference in percentage points between company-reported and author-calculated healthcare professional consent rates for the number of TOVs in 2015 and 2016 for each TOV type. Only discordant pairs are shown, i.e. differences larger than +/- 1.0 percentage point. Number of discordant pairs (n) in each plot are shown. Reference line indicates zero percentage point difference.



1  
2  
3 **Author statement:** SM conceived and drafted the paper, collected and analysed the data. PO  
4 contributed to concept development, data analysis and writing.  
5  
6

7 **Competing Interests:** None  
8  
9

10 **Funding:** This work was supported by The Swedish Research Council for Health, Working  
11 Life and Welfare (FORTE), grant no. 2016-00875 awarded to SM and PO.  
12  
13

14 **Data sharing statement:** Databases are publically available on ABPI webpage.  
15  
16  
17  
18  
19  
20  
21  
22  
23  
24  
25  
26  
27  
28  
29  
30  
31  
32  
33  
34  
35  
36  
37  
38  
39  
40  
41  
42  
43  
44  
45  
46  
47  
48  
49  
50  
51  
52  
53  
54  
55  
56  
57  
58  
59  
60

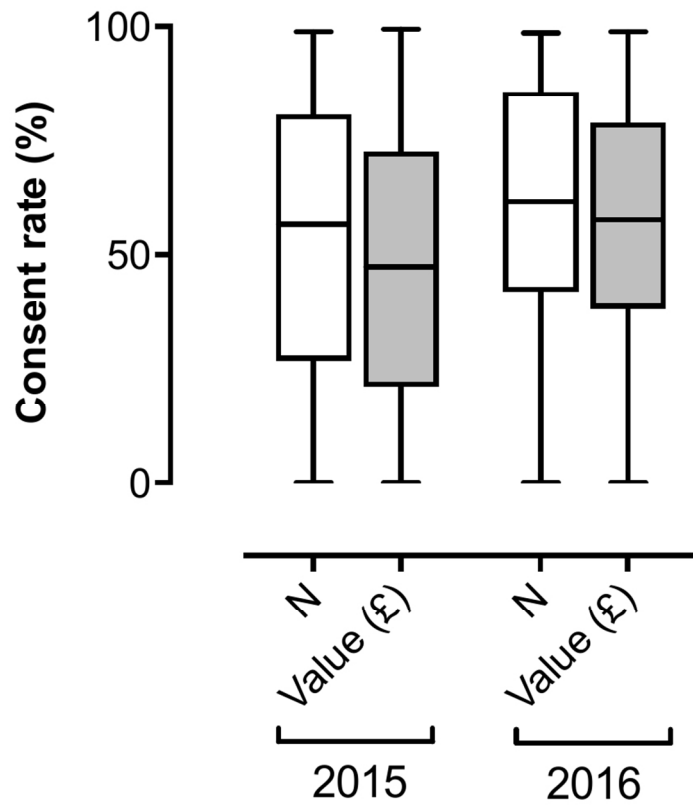

Box plots show author-calculated healthcare professional consent rates across companies in the 2015 (n=96) and 2016 (n=97) version of Disclosure UK. White depicts the number of TOVs; grey depicts monetary value of TOVs.

103x85mm (300 x 300 DPI)

only

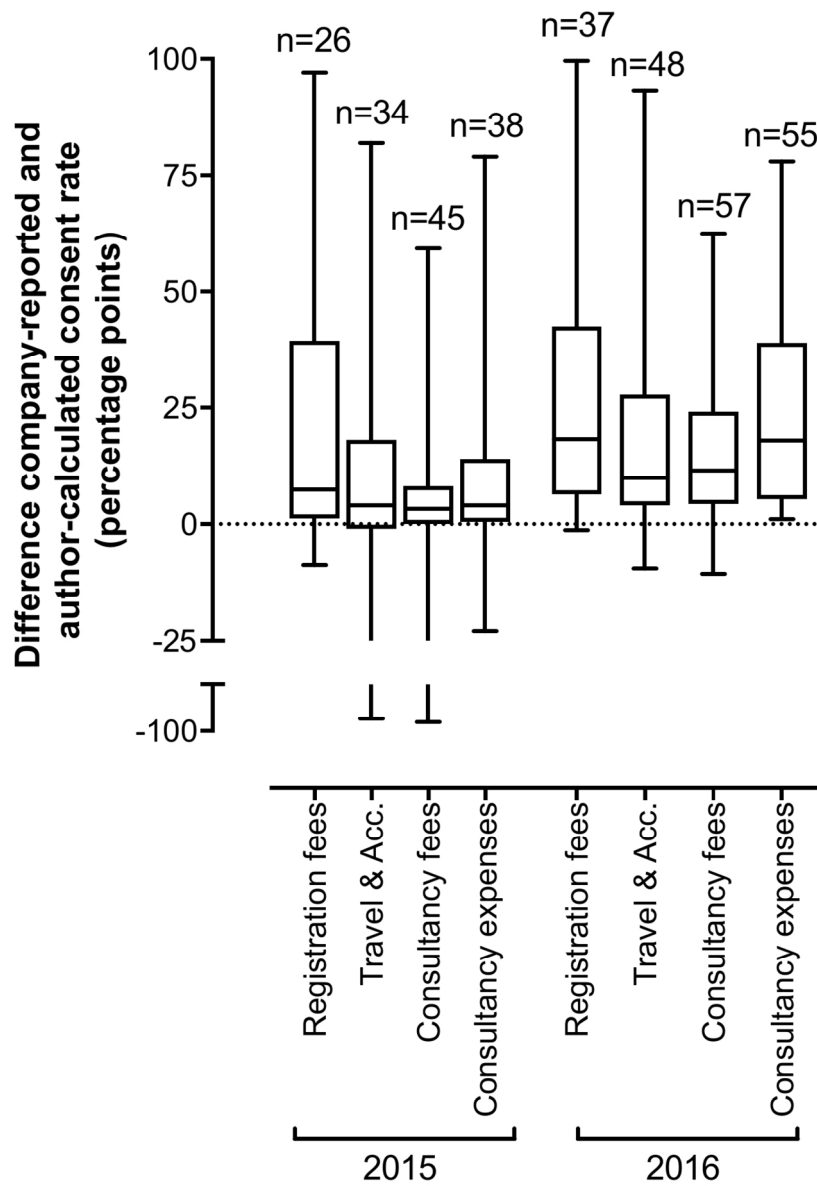

Figure 2. Box plots show the difference in percentage points between company-reported and author-calculated healthcare professional consent rates for the number of TOVs in 2015 and 2016 for each TOV type. Only discordant pairs are shown, i.e. differences larger than +/- 1.0 percentage point. Number of discordant pairs (n) in each plot are shown. Reference line indicates zero percentage point difference.

103x148mm (300 x 300 DPI)

### Appendix Table 1. Disclosure UK definitions related to transfers of value to healthcare professionals

| Element                                  | Definition <sup>a</sup>                                                                                                                                                                                                                                                                                                                                                                                                                                                                                                      |
|------------------------------------------|------------------------------------------------------------------------------------------------------------------------------------------------------------------------------------------------------------------------------------------------------------------------------------------------------------------------------------------------------------------------------------------------------------------------------------------------------------------------------------------------------------------------------|
| <b>Healthcare professional</b>           | Members of the medical, dental, pharmacy and nursing professions and any other persons who in the course of their professional activities may administer, prescribe, purchase, recommend or supply a medicine.                                                                                                                                                                                                                                                                                                               |
| <b>Transfer of value</b>                 | A direct or indirect transfer of value, whether in cash, in kind or otherwise, made, whether for promotional purposes or otherwise, in connection with the development or sale of medicines. A direct transfer of value is one made directly by a company for the benefit of a recipient. An indirect transfer of value is one made on behalf of a company for the benefit of a recipient or through an intermediate and where the company knows or can identify the recipient that will benefit from the transfer of value. |
| <b>Contribution to costs for events</b>  | TOVs covering <i>registration fees</i> and <i>travel &amp; accommodation</i> for all promotional, scientific or professional meetings, congresses, conferences, symposia, and other similar events, excluding costs that are clearly related to R&D.                                                                                                                                                                                                                                                                         |
| <b>Fees for services and consultancy</b> | TOVs covering <i>fees</i> and <i>expenses</i> resulting from or related to contracts between companies and HCPs under which such HCPs provide services to companies, excluding costs that are clearly related to R&D.                                                                                                                                                                                                                                                                                                        |

<sup>a</sup> Definitions are derived from the EFPIA Disclosure code and the ABPI Code of Practice.

**Appendix Table 2. Mandatory and optional variables related to transfers of value to healthcare professionals in Disclosure UK**

|                                     |                                                                                                                                                                                                                                                                       |
|-------------------------------------|-----------------------------------------------------------------------------------------------------------------------------------------------------------------------------------------------------------------------------------------------------------------------|
| <b>Individual level (mandatory)</b> | <ul style="list-style-type: none"> <li>• Title of HCP</li> <li>• Name of HCP</li> <li>• Country and city of principal practice of HCP</li> <li>• Principal practice address of HCP</li> <li>• Yearly amount per HCP and TOV type</li> </ul>                           |
| <b>Individual level (optional)</b>  | <ul style="list-style-type: none"> <li>• Speciality of HCP</li> <li>• Role of HCP</li> <li>• Total yearly amount per HCP across all TOV types</li> </ul>                                                                                                              |
| <b>Aggregate (mandatory)</b>        | <p>For each TOV type</p> <ul style="list-style-type: none"> <li>• the number of recipients in the aggregate disclosure</li> <li>• the percentage of recipients in the aggregate disclosure</li> <li>• the aggregate amount attributable to such recipients</li> </ul> |

**Appendix Table 3. Transfers of value to UK healthcare professionals: value, numbers and healthcare professional consent rates per company in 2015 and 2016**

| Company <sup>a</sup>  | 2015 <sup>b,c</sup> |        |      |        | 2016 <sup>b,c</sup> |        |      |        |
|-----------------------|---------------------|--------|------|--------|---------------------|--------|------|--------|
|                       | £                   | Rate £ | N    | Rate N | £                   | Rate £ | N    | Rate N |
| Bayer                 | 3159751.53          | 24.9%  | 2817 | 26.3%  | 3308420.84          | 33.9%  | 3090 | 34.5%  |
| AstraZeneca           | 3535413.23          | 66.9%  | 2631 | 88.1%  | 2465100.23          | 78.5%  | 2161 | 94.0%  |
| Pfizer                | 2509453.01          | 51.7%  | 3263 | 62.6%  | 3259314.86          | 88.8%  | 3409 | 97.2%  |
| Janssen-Cilag         | 2912280.38          | 68.4%  | 3521 | 85.3%  | 2401589.87          | 69.7%  | 2635 | 84.8%  |
| Merck Sharp & Dohme   | 3076957.74          | 1.2%   | 2568 | 1.8%   | 2031187.84          | 67.8%  | 1753 | 60.1%  |
| Novo Nordisk          | 2222001.79          | 25.9%  | 2099 | 34.2%  | 2517087.73          | 31.7%  | 1984 | 40.9%  |
| Novartis              | 2211719.11          | 57.8%  | 2322 | 77.9%  | 2151112.54          | 85.3%  | 2520 | 93.1%  |
| Abbvie                | 1564813.16          | 59.2%  | 1512 | 64.0%  | 2053533.0           | 65.3%  | 1929 | 66.0%  |
| Sanofi Aventis        | 1466907.46          | 45.7%  | 1016 | 74.3%  | 1872099.77          | 60.2%  | 1406 | 85.3%  |
| Eli Lilly             | 1536223.0           | 38.2%  | 1811 | 44.2%  | 1677839.0           | 42.5%  | 2193 | 43.6%  |
| Astellas              | 1827995.2           | 55.4%  | 3019 | 56.6%  | 1215637.23          | 63.1%  | 1947 | 62.3%  |
| Roche                 | 1455735.79          | 54.8%  | 1513 | 52.5%  | 1430433.44          | 55.3%  | 1352 | 50.9%  |
| Gilead                | 1306053.44          | 73.6%  | 1046 | 80.1%  | 1478764.99          | 71.8%  | 1295 | 85.9%  |
| Bristol-Myer Squibb   | 1549787.0           | 20.8%  | 1055 | 28.1%  | 851293.86           | 44.0%  | 966  | 30.7%  |
| Allergan              | 1306149.86          | 12.3%  | 1416 | 10.2%  | 1032918.16          | 20.8%  | 1004 | 6.5%   |
| GlaxoSmithKline       | 1456604.18          | 94.7%  | 922  | 96.7%  | 456573.77           | 94.7%  | 224  | 93.3%  |
| Takeda                | 940687.85           | 39.7%  | 986  | 58.2%  | 728964.2            | 53.5%  | 730  | 57.3%  |
| Napp                  | 628996.24           | 20.5%  | 1083 | 13.1%  | 976205.64           | 10.5%  | 841  | 10.1%  |
| Merck Serono          | 754664.68           | 39.4%  | 790  | 49.1%  | 826112.82           | 38.9%  | 920  | 41.5%  |
| Servier               | 773827.0            | 26.4%  | 993  | 42.3%  | 652946.0            | 34.4%  | 769  | 54.0%  |
| Boehringer Ingelheim  | 1048816.74          | 21.3%  | 982  | 17.0%  | 305666.53           | 33.1%  | 393  | 32.8%  |
| Amgen                 | 521029.24           | 70.1%  | 586  | 78.0%  | 746845.6            | 74.5%  | 618  | 81.9%  |
| Teva                  | 645267.2            | 72.7%  | 1004 | 92.7%  | 613419.32           | 89.0%  | 938  | 94.3%  |
| Celgene               | 625409.08           | 76.4%  | 681  | 91.8%  | 543539.96           | 92.2%  | 616  | 97.4%  |
| Biogen                | 591279.32           | 39.1%  | 481  | 36.2%  | 548807.95           | 55.7%  | 534  | 55.4%  |
| Lundbeck              | 640573.65           | 71.4%  | 546  | 81.5%  | 474701.11           | 80.2%  | 288  | 87.2%  |
| Shire                 | 489890.6            | 40.6%  | 753  | 50.5%  | 609993.99           | 29.3%  | 854  | 41.6%  |
| Chiesi                | 444695.41           | 47.3%  | 993  | 55.0%  | 458128.85           | 49.5%  | 913  | 68.7%  |
| Alexion               | 368849.66           | N/A    | 192  | N/A    | 503918.85           | 75.7%  | 384  | 86.2%  |
| Ferring               | 307893.54           | 97.0%  | 681  | 97.9%  | 407998.51           | 98.3%  | 651  | 98.6%  |
| Leo Pharma            | 407685.31           | 79.8%  | 477  | 83.0%  | 286664.94           | 53.1%  | 375  | 70.4%  |
| Ipsen                 | 301323.9            | 19.2%  | 408  | 27.0%  | 374106.85           | 52.9%  | 530  | 58.5%  |
| Actelion              | 313106.09           | N/A    | 257  | N/A    | 356376.53           | N/A    | 303  | N/A    |
| Otsuka                | 408626.56           | 62.9%  | 431  | 61.3%  | 244212.9            | 70.5%  | 280  | 70.0%  |
| UCB Pharma            | 345118.97           | 89.6%  | 482  | 95.9%  | 301511.22           | 74.7%  | 388  | 76.5%  |
| Mundipharma           | 352716.36           | 31.4%  | 277  | 37.9%  | 270516.63           | 32.2%  | 209  | 30.1%  |
| Alcon                 | 63003.67            | 64.3%  | 107  | 68.2%  | 545034.66           | 4.4%   | 387  | 9.6%   |
| Sunovion              | 199678.54           | 11.1%  | 359  | 5.0%   | 389470.11           | 20.8%  | 404  | 16.1%  |
| Britannia Pharmaceut. | 306612.79           | 31.4%  | 519  | 27.6%  | 275986.24           | 10.8%  | 296  | 18.2%  |
| Genzyme               | 485188.61           | 59.7%  | 363  | 73.6%  |                     |        |      |        |
| Almirall              | 278767.32           | 36.7%  | 360  | 33.9%  | 199570.03           | 25.8%  | 264  | 24.6%  |
| Eisai                 | 223359.54           | 1.5%   | 310  | 1.9%   | 245975.76           | 50.0%  | 390  | 47.7%  |
| Baxter                | 255137.4            | 78.1%  | 745  | 68.3%  | 213814.37           | 85.4%  | 605  | 79.2%  |
| Sandoz                | 227441.4            | 46.6%  | 336  | 47.9%  | 215214.15           | 66.1%  | 291  | 59.1%  |
| Grunenthal            | 246726.43           | 71.4%  | 261  | 73.9%  | 190316.65           | 56.6%  | 169  | 63.9%  |
| Daiichi Sankyo        | 220747.0            | 82.1%  | 120  | 73.3%  | 189262.35           | N/A    | 99   | N/A    |
| Chugai Pharma         | 286373.49           | 17.4%  | 258  | 24.4%  | 112438.72           | 42.4%  | 208  | 41.3%  |
| Stirling Anglian      | 294263.67           | 13.7%  | 138  | 15.9%  | 99271.44            | 0.0%   | 7    | 0.0%   |
| Jazz                  | 188260.97           | N/A    | 234  | N/A    | 197620.41           | 87.1%  | 215  | 92.6%  |
| A. Menarini           | 183910.75           | 38.5%  | 290  | 45.9%  | 199534.57           | 47.6%  | 425  | 44.9%  |
| Norgine               | 249679.0            | 90.4%  | 503  | 90.9%  | 126734.0            | 95.3%  | 310  | 96.8%  |
| Vifor                 | 177596.18           | 46.8%  | 221  | 50.2%  | 198170.14           | 52.8%  | 241  | 46.5%  |
| Merz Pharma           | 189462.24           | 26.8%  | 321  | 10.6%  | 185739.27           | 82.4%  | 191  | 89.5%  |
| Tillotts Pharma       | 176466.55           | 48.1%  | 251  | 42.2%  | 166281.0            | 40.8%  | 294  | 38.1%  |
| Sobi                  | 112196.0            | 82.9%  | 142  | 84.5%  | 201602.0            | 79.2%  | 195  | 89.7%  |
| Bausch & Lomb         | 99214.94            | 89.6%  | 72   | 94.4%  | 213391.81           | 98.0%  | 38   | 89.5%  |
| CSL Behring           | 127282.86           | 13.9%  | 208  | 18.8%  | 180149.66           | 17.8%  | 246  | 19.5%  |
| Alimera               | 141895.08           | 59.2%  | 145  | 60.7%  | 104980.22           | 71.6%  | 120  | 73.3%  |
| Baxalta               | 108841.04           | 72.9%  | 109  | 81.7%  | 112591.45           | 21.6%  | 104  | 48.1%  |

|                       |                  |              |              |              |                    |              |              |              |
|-----------------------|------------------|--------------|--------------|--------------|--------------------|--------------|--------------|--------------|
| Santen                | 89402.76         | 40.5%        | 98           | 62.2%        | 117740.97          | 59.3%        | 128          | 65.6%        |
| Pierre Fabre          | 139369.27        | 99.5%        | 187          | 98.9%        | 65778.26           | N/A          | 96           | N/A          |
| Flynn                 | 109136.69        | 97.3%        | 109          | 90.8%        | 81375.13           | 98.9%        | 189          | 98.4%        |
| Sanofi Pasteur MSD    | 89631.94         | 99.5%        | 92           | 97.8%        | 99363.2            | 93.8%        | 129          | 90.7%        |
| Actavis               | 35417.52         | 30.5%        | 115          | 37.4%        | 147490.36          | 25.8%        | 156          | 80.1%        |
| Bial Pharma UK        |                  |              |              |              | 176271.02          | 69.6%        | 172          | 56.4%        |
| Besins                | 82198.2          | 58.3%        | 149          | 57.0%        | 85835.68           | 84.9%        | 152          | 78.3%        |
| Meda                  | 81096.74         | 16.2%        | 144          | 25.0%        | 78158.34           | 55.3%        | 115          | 54.8%        |
| ALK-Abello            | 86092.07         | 87.6%        | 111          | 86.5%        | 72616.23           | 95.9%        | 132          | 93.9%        |
| Shionogi              | 39219.34         | 28.7%        | 46           | 13.0%        | 110557.95          | 78.8%        | 18           | 50.0%        |
| BioMarin Europe       | 99611.0          | 84.2%        | 79           | 94.9%        | 47256.27           | 82.3%        | 37           | 89.2%        |
| Thea                  | 57837.2          | 0,0%         | 67           | 0,0%         | 88595.53           | 0,0%         | 161          | 0,0%         |
| Dermal                | 68976.77         | 87.6%        | 150          | 79.3%        | 72868.4            | 85.3%        | 133          | 73.7%        |
| Gedeon Richter        | 93535.33         | 51.9%        | 154          | 56.5%        | 45916.67           | 37.6%        | 78           | 52.6%        |
| Pharma Mar            | 43886.92         | 50.5%        | 97           | 48.5%        | 92639.69           | 66.2%        | 153          | 75.2%        |
| Consilient Health     | 79285,0          | 59.3%        | 60           | 61.7%        | 53710,0            | 43.5%        | 73           | 38.4%        |
| Fresenius-Kabi        | 32517.14         | 8.6%         | 65           | 6.2%         | 95531.07           | 71.3%        | 275          | 75.6%        |
| Vifor F. Med. Care R. | 17545.93         | 6,0%         | 12           | 33.3%        | 97196.1            | 52.7%        | 55           | 52.7%        |
| Galen                 | 70097.81         | 94.2%        | 58           | 98.3%        | 43287.14           | 98.3%        | 60           | 96.7%        |
| Hospira               | 77501.37         | 0,0%         | 87           | 0,0%         | 24779.61           | N/A          | 23           | N/A          |
| Biotest               | 54416.34         | 51.3%        | 112          | 77.7%        | 45528.94           | 74.9%        | 102          | 82.4%        |
| Octapharma            | 42296.03         | 15.1%        | 48           | 52.1%        | 57424.94           | 45.9%        | 69           | 60.9%        |
| Profile Pharma        | 40829.51         | 75,0%        | 22           | 86.4%        | 58360.36           | 58.7%        | 70           | 48.6%        |
| ApoPharma             | 89730.81         | 2,0%         | 12           | 16.7%        | 8079,0             | 50,0%        | 15           | 20,0%        |
| Orion Pharma          | 73501.22         | 80.5%        | 336          | 69,0%        | 22042.33           | N/A          | 43           | N/A          |
| RB                    | 33609,0          | 90.6%        | 29           | 82.8%        | 51831.91           | 97.5%        | 48           | 93.8%        |
| Grifols               |                  |              |              |              | 76806.76           | 34.3%        | 99           | 42.4%        |
| Novex                 | 44000,0          | 34,0%        | 10           | 30,0%        | 25675.7            | 56.5%        | 9            | 33.3%        |
| Guerbet Laboratories  | 25860.99         | 17,0%        | 40           | 12.5%        | 41030.23           | 63.2%        | 37           | 45.9%        |
| PTC Therapeutics      | 12397.2          | 13,0%        | 20           | 15,0%        | 52998.57           | 94.6%        | 58           | 89.7%        |
| Intercept Pharma      |                  |              |              |              | 62202,0            | 15.7%        | 27           | 48.1%        |
| Diurnal               | 34223,0          | N/A          | 1            | N/A          | 19936,0            | N/A          | 14           | N/A          |
| HRA Phara             | 50906.76         | N/A          | 26           | N/A          | 2181,0             | N/A          | 2            | N/A          |
| BGP Products          | 52906.5          | 10.8%        | 89           | 19.1%        |                    |              |              |              |
| Bracco                | 8497.98          | 39.4%        | 26           | 23.1%        | 39962.23           | 94.4%        | 34           | 82.4%        |
| GE Healthcare         |                  |              |              |              | 48089,0            | 14.3%        | 66           | 18.2%        |
| Alliance              | 14547.75         | 72.2%        | 36           | 83.3%        | 29486.15           | N/A          | 79           | N/A          |
| Syner-med             | 11109.38         | N/A          | 20           | N/A          | 30180.03           | N/A          | 52           | N/A          |
| Aegerion              | 16589.98         | N/A          | 13           | N/A          | 13610.19           | 42.3%        | 14           | 85.7%        |
| Shield TX             |                  |              |              |              | 29447.7            | 97.2%        | 45           | 95.6%        |
| Valneva               |                  |              |              |              | 27379.38           | N/A          | 4            | N/A          |
| Orphan Europe         | 25831.44         | 93,0%        | 15           | 73.3%        |                    |              |              |              |
| Seqirus               |                  |              |              |              | 24263.26           | N/A          | 4            | N/A          |
| Bio Products          | 13636.52         | 12,0%        | 34           | 29.4%        | 8698.44            | 71.3%        | 20           | 95,0%        |
| Martindale            | 14581.65         | 0,0%         | 17           | 0,0%         | 7366.37            | 7.5%         | 7            | 42.9%        |
| Amdipharm Mercury     | 19916.43         | 43.9%        | 30           | 56.7%        |                    |              |              |              |
| Amicus Therapeutics   |                  |              |              |              | 17583.14           | 0,0%         | 16           | 0,0%         |
| CEB Pharma            | 15431.98         | 83.9%        | 62           | 83.9%        |                    |              |              |              |
| Fresenius Med. Care   |                  |              |              |              | 15298.49           | 52.8%        | 10           | 60,0%        |
| Nicovations           | 12331,0          | 0,0%         | 14           | 0,0%         |                    |              |              |              |
| Accretio              | 2460,0           | 67,0%        | 8            | 75,0%        | 8906.71            | 66.7%        | 17           | 70.6%        |
| Mitsubishi Tanabe     | 4988,0           | 60,0%        | 7            | 85.7%        | 5124.2             | N/A          | 13           | N/A          |
| Rosemont Pharmac.     | 5235.17          | 32,0%        | 4            | 75,0%        | 4646.93            | 48.4%        | 5            | 80,0%        |
| Cuxson Gerrard        | 2799.5           | 0,0%         | 9            | 0,0%         | 4369,0             | 0,0%         | 13           | 0,0%         |
| Tesaro                |                  |              |              |              | 6726.51            | 67.8%        | 8            | 62.5%        |
| Augettant             | 1459.51          | N/A          | 1            | N/A          | 4153.47            | N/A          | 5            | N/A          |
| STD Pharmaceuticals   | 600,0            | N/A          | 1            | N/A          |                    |              |              |              |
| Special Products      | 266.2            | N/A          | 2            | N/A          |                    |              |              |              |
| <b>Total</b>          | <b>50,967728</b> | <b>47.9%</b> | <b>54910</b> | <b>55.5%</b> | <b>47,543051.1</b> | <b>59.2%</b> | <b>50241</b> | <b>64.5%</b> |

<sup>a</sup> Companies are listed according to the total value of TOVs in both years

<sup>b</sup> Empty cells mean that company was not in database that year

<sup>c</sup> N/A means company did not provide information on any TOV in aggregate and therefore the consent rate cannot be calculated.
