# Supplementary material for: Disclosure of payments by pharmaceutical companies to healthcare professionals in the UK: analysis of the Association of the British Pharmaceutical Industry’s Disclosure UK database, 2015 and 2016 cohorts
Source: PubMed Central journal article supplement — BMJ Open. 2018 Oct 21;8(10):e023094. doi: 10.1136/bmjopen-2018-023094 (PMC6196800; doi:10.1136/bmjopen-2018-023094), 2018-10-21
Supplement: bmjopen-2018-023094supp001.pdf [file bmjopen-2018-023094supp001.pdf]

**Appendix Table 1. Disclosure UK definitions related to transfers of value to healthcare professionals**

| Element                                  | Definition <sup>a</sup>                                                                                                                                                                                                                                                                                                                                                                                                                                                                                                      |
|------------------------------------------|------------------------------------------------------------------------------------------------------------------------------------------------------------------------------------------------------------------------------------------------------------------------------------------------------------------------------------------------------------------------------------------------------------------------------------------------------------------------------------------------------------------------------|
| <b>Healthcare professional</b>           | Members of the medical, dental, pharmacy and nursing professions and any other persons who in the course of their professional activities may administer, prescribe, purchase, recommend or supply a medicine.                                                                                                                                                                                                                                                                                                               |
| <b>Transfer of value</b>                 | A direct or indirect transfer of value, whether in cash, in kind or otherwise, made, whether for promotional purposes or otherwise, in connection with the development or sale of medicines. A direct transfer of value is one made directly by a company for the benefit of a recipient. An indirect transfer of value is one made on behalf of a company for the benefit of a recipient or through an intermediate and where the company knows or can identify the recipient that will benefit from the transfer of value. |
| <b>Contribution to costs for events</b>  | TOVs covering <i>registration fees</i> and <i>travel &amp; accommodation</i> for all promotional, scientific or professional meetings, congresses, conferences, symposia, and other similar events, excluding costs that are clearly related to R&D.                                                                                                                                                                                                                                                                         |
| <b>Fees for services and consultancy</b> | TOVs covering <i>fees</i> and <i>expenses</i> resulting from or related to contracts between companies and HCPs under which such HCPs provide services to companies, excluding costs that are clearly related to R&D.                                                                                                                                                                                                                                                                                                        |

<sup>a</sup> Definitions are derived from the EFPIA Disclosure code and the ABPI Code of Practice.
