# Supplementary material for: Disclosure of payments by pharmaceutical companies to healthcare professionals in the UK: analysis of the Association of the British Pharmaceutical Industry’s Disclosure UK database, 2015 and 2016 cohorts
Source: PubMed Central journal article supplement — BMJ Open. 2018 Oct 21;8(10):e023094. doi: 10.1136/bmjopen-2018-023094 (PMC6196800; doi:10.1136/bmjopen-2018-023094), 2018-10-21
Supplement: bmjopen-2018-023094supp002.pdf [file bmjopen-2018-023094supp002.pdf]

**Appendix Table 2. Mandatory and optional variables related to transfers of value to healthcare professionals in Disclosure UK**

|                                     |                                                                                                                                                                                                                                                                       |
|-------------------------------------|-----------------------------------------------------------------------------------------------------------------------------------------------------------------------------------------------------------------------------------------------------------------------|
| <b>Individual level (mandatory)</b> | <ul style="list-style-type: none"> <li>• Title of HCP</li> <li>• Name of HCP</li> <li>• Country and city of principal practice of HCP</li> <li>• Principal practice address of HCP</li> <li>• Yearly amount per HCP and TOV type</li> </ul>                           |
| <b>Individual level (optional)</b>  | <ul style="list-style-type: none"> <li>• Speciality of HCP</li> <li>• Role of HCP</li> <li>• Total yearly amount per HCP across all TOV types</li> </ul>                                                                                                              |
| <b>Aggregate (mandatory)</b>        | <p>For each TOV type</p> <ul style="list-style-type: none"> <li>• the number of recipients in the aggregate disclosure</li> <li>• the percentage of recipients in the aggregate disclosure</li> <li>• the aggregate amount attributable to such recipients</li> </ul> |
