# Supplementary material for: Disclosure of payments by pharmaceutical companies to healthcare professionals in the UK: analysis of the Association of the British Pharmaceutical Industry’s Disclosure UK database, 2015 and 2016 cohorts
Source: PubMed Central journal article supplement — BMJ Open. 2018 Oct 21;8(10):e023094. doi: 10.1136/bmjopen-2018-023094 (PMC6196800; doi:10.1136/bmjopen-2018-023094), 2018-10-21
Supplement: bmjopen-2018-023094supp003.pdf [file bmjopen-2018-023094supp003.pdf]

**Appendix Table 3. Transfers of value to UK healthcare professionals: value, numbers and healthcare professional consent rates per company in 2015 and 2016**

| Company <sup>a</sup>  | 2015 <sup>b,c</sup> |        |      |        | 2016 <sup>b,c</sup> |        |      |        |
|-----------------------|---------------------|--------|------|--------|---------------------|--------|------|--------|
|                       | £                   | Rate £ | N    | Rate N | £                   | Rate £ | N    | Rate N |
| Bayer                 | 3159751.53          | 24.9%  | 2817 | 26.3%  | 3308420.84          | 33.9%  | 3090 | 34.5%  |
| AstraZeneca           | 3535413.23          | 66.9%  | 2631 | 88.1%  | 2465100.23          | 78.5%  | 2161 | 94.0%  |
| Pfizer                | 2509453.01          | 51.7%  | 3263 | 62.6%  | 3259314.86          | 88.8%  | 3409 | 97.2%  |
| Janssen-Cilag         | 2912280.38          | 68.4%  | 3521 | 85.3%  | 2401589.87          | 69.7%  | 2635 | 84.8%  |
| Merck Sharp & Dohme   | 3076957.74          | 1.2%   | 2568 | 1.8%   | 2031187.84          | 67.8%  | 1753 | 60.1%  |
| Novo Nordisk          | 2222001.79          | 25.9%  | 2099 | 34.2%  | 2517087.73          | 31.7%  | 1984 | 40.9%  |
| Novartis              | 2211719.11          | 57.8%  | 2322 | 77.9%  | 2151112.54          | 85.3%  | 2520 | 93.1%  |
| Abbvie                | 1564813.16          | 59.2%  | 1512 | 64.0%  | 2053533.0           | 65.3%  | 1929 | 66.0%  |
| Sanofi Aventis        | 1466907.46          | 45.7%  | 1016 | 74.3%  | 1872099.77          | 60.2%  | 1406 | 85.3%  |
| Eli Lilly             | 1536223.0           | 38.2%  | 1811 | 44.2%  | 1677839.0           | 42.5%  | 2193 | 43.6%  |
| Astellas              | 1827995.2           | 55.4%  | 3019 | 56.6%  | 1215637.23          | 63.1%  | 1947 | 62.3%  |
| Roche                 | 1455735.79          | 54.8%  | 1513 | 52.5%  | 1430433.44          | 55.3%  | 1352 | 50.9%  |
| Gilead                | 1306053.44          | 73.6%  | 1046 | 80.1%  | 1478764.99          | 71.8%  | 1295 | 85.9%  |
| Bristol-Myer Squibb   | 1549787.0           | 20.8%  | 1055 | 28.1%  | 851293.86           | 44.0%  | 966  | 30.7%  |
| Allergan              | 1306149.86          | 12.3%  | 1416 | 10.2%  | 1032918.16          | 20.8%  | 1004 | 6.5%   |
| GlaxoSmithKline       | 1456604.18          | 94.7%  | 922  | 96.7%  | 456573.77           | 94.7%  | 224  | 93.3%  |
| Takeda                | 940687.85           | 39.7%  | 986  | 58.2%  | 728964.2            | 53.5%  | 730  | 57.3%  |
| Napp                  | 628996.24           | 20.5%  | 1083 | 13.1%  | 976205.64           | 10.5%  | 841  | 10.1%  |
| Merck Serono          | 754664.68           | 39.4%  | 790  | 49.1%  | 826112.82           | 38.9%  | 920  | 41.5%  |
| Servier               | 773827.0            | 26.4%  | 993  | 42.3%  | 652946.0            | 34.4%  | 769  | 54.0%  |
| Boehringer Ingelheim  | 1048816.74          | 21.3%  | 982  | 17.0%  | 305666.53           | 33.1%  | 393  | 32.8%  |
| Amgen                 | 521029.24           | 70.1%  | 586  | 78.0%  | 746845.6            | 74.5%  | 618  | 81.9%  |
| Teva                  | 645267.2            | 72.7%  | 1004 | 92.7%  | 613419.32           | 89.0%  | 938  | 94.3%  |
| Celgene               | 625409.08           | 76.4%  | 681  | 91.8%  | 543539.96           | 92.2%  | 616  | 97.4%  |
| Biogen                | 591279.32           | 39.1%  | 481  | 36.2%  | 548807.95           | 55.7%  | 534  | 55.4%  |
| Lundbeck              | 640573.65           | 71.4%  | 546  | 81.5%  | 474701.11           | 80.2%  | 288  | 87.2%  |
| Shire                 | 489890.6            | 40.6%  | 753  | 50.5%  | 609993.99           | 29.3%  | 854  | 41.6%  |
| Chiesi                | 444695.41           | 47.3%  | 993  | 55.0%  | 458128.85           | 49.5%  | 913  | 68.7%  |
| Alexion               | 368849.66           | N/A    | 192  | N/A    | 503918.85           | 75.7%  | 384  | 86.2%  |
| Ferring               | 307893.54           | 97.0%  | 681  | 97.9%  | 407998.51           | 98.3%  | 651  | 98.6%  |
| Leo Pharma            | 407685.31           | 79.8%  | 477  | 83.0%  | 286664.94           | 53.1%  | 375  | 70.4%  |
| Ipsen                 | 301323.9            | 19.2%  | 408  | 27.0%  | 374106.85           | 52.9%  | 530  | 58.5%  |
| Actelion              | 313106.09           | N/A    | 257  | N/A    | 356376.53           | N/A    | 303  | N/A    |
| Otsuka                | 408626.56           | 62.9%  | 431  | 61.3%  | 244212.9            | 70.5%  | 280  | 70.0%  |
| UCB Pharma            | 345118.97           | 89.6%  | 482  | 95.9%  | 301511.22           | 74.7%  | 388  | 76.5%  |
| Mundipharma           | 352716.36           | 31.4%  | 277  | 37.9%  | 270516.63           | 32.2%  | 209  | 30.1%  |
| Alcon                 | 63003.67            | 64.3%  | 107  | 68.2%  | 545034.66           | 4.4%   | 387  | 9.6%   |
| Sunovion              | 199678.54           | 11.1%  | 359  | 5.0%   | 389470.11           | 20.8%  | 404  | 16.1%  |
| Britannia Pharmaceut. | 306612.79           | 31.4%  | 519  | 27.6%  | 275986.24           | 10.8%  | 296  | 18.2%  |
| Genzyme               | 485188.61           | 59.7%  | 363  | 73.6%  |                     |        |      |        |
| Almirall              | 278767.32           | 36.7%  | 360  | 33.9%  | 199570.03           | 25.8%  | 264  | 24.6%  |
| Eisai                 | 223359.54           | 1.5%   | 310  | 1.9%   | 245975.76           | 50.0%  | 390  | 47.7%  |
| Baxter                | 255137.4            | 78.1%  | 745  | 68.3%  | 213814.37           | 85.4%  | 605  | 79.2%  |
| Sandoz                | 227441.4            | 46.6%  | 336  | 47.9%  | 215214.15           | 66.1%  | 291  | 59.1%  |
| Grunenthal            | 246726.43           | 71.4%  | 261  | 73.9%  | 190316.65           | 56.6%  | 169  | 63.9%  |
| Daiichi Sankyo        | 220747.0            | 82.1%  | 120  | 73.3%  | 189262.35           | N/A    | 99   | N/A    |
| Chugai Pharma         | 286373.49           | 17.4%  | 258  | 24.4%  | 112438.72           | 42.4%  | 208  | 41.3%  |
| Stirling Anglian      | 294263.67           | 13.7%  | 138  | 15.9%  | 99271.44            | 0.0%   | 7    | 0.0%   |
| Jazz                  | 188260.97           | N/A    | 234  | N/A    | 197620.41           | 87.1%  | 215  | 92.6%  |
| A. Menarini           | 183910.75           | 38.5%  | 290  | 45.9%  | 199534.57           | 47.6%  | 425  | 44.9%  |
| Norgine               | 249679.0            | 90.4%  | 503  | 90.9%  | 126734.0            | 95.3%  | 310  | 96.8%  |
| Vifor                 | 177596.18           | 46.8%  | 221  | 50.2%  | 198170.14           | 52.8%  | 241  | 46.5%  |
| Merz Pharma           | 189462.24           | 26.8%  | 321  | 10.6%  | 185739.27           | 82.4%  | 191  | 89.5%  |
| Tillotts Pharma       | 176466.55           | 48.1%  | 251  | 42.2%  | 166281.0            | 40.8%  | 294  | 38.1%  |
| Sobi                  | 112196.0            | 82.9%  | 142  | 84.5%  | 201602.0            | 79.2%  | 195  | 89.7%  |
| Bausch & Lomb         | 99214.94            | 89.6%  | 72   | 94.4%  | 213391.81           | 98.0%  | 38   | 89.5%  |
| CSL Behring           | 127282.86           | 13.9%  | 208  | 18.8%  | 180149.66           | 17.8%  | 246  | 19.5%  |
| Alimera               | 141895.08           | 59.2%  | 145  | 60.7%  | 104980.22           | 71.6%  | 120  | 73.3%  |
| Baxalta               | 108841.04           | 72.9%  | 109  | 81.7%  | 112591.45           | 21.6%  | 104  | 48.1%  |

|                       |                  |              |              |              |                    |              |              |              |
|-----------------------|------------------|--------------|--------------|--------------|--------------------|--------------|--------------|--------------|
| Santen                | 89402.76         | 40.5%        | 98           | 62.2%        | 117740.97          | 59.3%        | 128          | 65.6%        |
| Pierre Fabre          | 139369.27        | 99.5%        | 187          | 98.9%        | 65778.26           | N/A          | 96           | N/A          |
| Flynn                 | 109136.69        | 97.3%        | 109          | 90.8%        | 81375.13           | 98.9%        | 189          | 98.4%        |
| Sanofi Pasteur MSD    | 89631.94         | 99.5%        | 92           | 97.8%        | 99363.2            | 93.8%        | 129          | 90.7%        |
| Actavis               | 35417.52         | 30.5%        | 115          | 37.4%        | 147490.36          | 25.8%        | 156          | 80.1%        |
| Bial Pharma UK        |                  |              |              |              | 176271.02          | 69.6%        | 172          | 56.4%        |
| Besins                | 82198.2          | 58.3%        | 149          | 57.0%        | 85835.68           | 84.9%        | 152          | 78.3%        |
| Meda                  | 81096.74         | 16.2%        | 144          | 25.0%        | 78158.34           | 55.3%        | 115          | 54.8%        |
| ALK-Abello            | 86092.07         | 87.6%        | 111          | 86.5%        | 72616.23           | 95.9%        | 132          | 93.9%        |
| Shionogi              | 39219.34         | 28.7%        | 46           | 13.0%        | 110557.95          | 78.8%        | 18           | 50.0%        |
| BioMarin Europe       | 99611,0          | 84.2%        | 79           | 94.9%        | 47256.27           | 82.3%        | 37           | 89.2%        |
| Thea                  | 57837.2          | 0,0%         | 67           | 0,0%         | 88595.53           | 0,0%         | 161          | 0,0%         |
| Dermal                | 68976.77         | 87.6%        | 150          | 79.3%        | 72868.4            | 85.3%        | 133          | 73.7%        |
| Gedeon Richter        | 93535.33         | 51.9%        | 154          | 56.5%        | 45916.67           | 37.6%        | 78           | 52.6%        |
| Pharma Mar            | 43886.92         | 50.5%        | 97           | 48.5%        | 92639.69           | 66.2%        | 153          | 75.2%        |
| Consilient Health     | 79285,0          | 59.3%        | 60           | 61.7%        | 53710,0            | 43.5%        | 73           | 38.4%        |
| Fresenius-Kabi        | 32517.14         | 8.6%         | 65           | 6.2%         | 95531.07           | 71.3%        | 275          | 75.6%        |
| Vifor F. Med. Care R. | 17545.93         | 6,0%         | 12           | 33.3%        | 97196.1            | 52.7%        | 55           | 52.7%        |
| Galen                 | 70097.81         | 94.2%        | 58           | 98.3%        | 43287.14           | 98.3%        | 60           | 96.7%        |
| Hospira               | 77501.37         | 0,0%         | 87           | 0,0%         | 24779.61           | N/A          | 23           | N/A          |
| Biotest               | 54416.34         | 51.3%        | 112          | 77.7%        | 45528.94           | 74.9%        | 102          | 82.4%        |
| Octapharma            | 42296.03         | 15.1%        | 48           | 52.1%        | 57424.94           | 45.9%        | 69           | 60.9%        |
| Profile Pharma        | 40829.51         | 75,0%        | 22           | 86.4%        | 58360.36           | 58.7%        | 70           | 48.6%        |
| ApoPharma             | 89730.81         | 2,0%         | 12           | 16.7%        | 8079,0             | 50,0%        | 15           | 20,0%        |
| Orion Pharma          | 73501.22         | 80.5%        | 336          | 69,0%        | 22042.33           | N/A          | 43           | N/A          |
| RB                    | 33609,0          | 90.6%        | 29           | 82.8%        | 51831.91           | 97.5%        | 48           | 93.8%        |
| Grifols               |                  |              |              |              | 76806.76           | 34.3%        | 99           | 42.4%        |
| Novex                 | 44000,0          | 34,0%        | 10           | 30,0%        | 25675.7            | 56.5%        | 9            | 33.3%        |
| Guerbet Laboratories  | 25860.99         | 17,0%        | 40           | 12.5%        | 41030.23           | 63.2%        | 37           | 45.9%        |
| PTC Therapeutics      | 12397.2          | 13,0%        | 20           | 15,0%        | 52998.57           | 94.6%        | 58           | 89.7%        |
| Intercept Pharma      |                  |              |              |              | 62202,0            | 15.7%        | 27           | 48.1%        |
| Diurnal               | 34223,0          | N/A          | 1            | N/A          | 19936,0            | N/A          | 14           | N/A          |
| HRA Phara             | 50906.76         | N/A          | 26           | N/A          | 2181,0             | N/A          | 2            | N/A          |
| BGP Products          | 52906.5          | 10.8%        | 89           | 19.1%        |                    |              |              |              |
| Bracco                | 8497.98          | 39.4%        | 26           | 23.1%        | 39962.23           | 94.4%        | 34           | 82.4%        |
| GE Healthcare         |                  |              |              |              | 48089,0            | 14.3%        | 66           | 18.2%        |
| Alliance              | 14547.75         | 72.2%        | 36           | 83.3%        | 29486.15           | N/A          | 79           | N/A          |
| Syner-med             | 11109.38         | N/A          | 20           | N/A          | 30180.03           | N/A          | 52           | N/A          |
| Aegerion              | 16589.98         | N/A          | 13           | N/A          | 13610.19           | 42.3%        | 14           | 85.7%        |
| Shield TX             |                  |              |              |              | 29447.7            | 97.2%        | 45           | 95.6%        |
| Valneva               |                  |              |              |              | 27379.38           | N/A          | 4            | N/A          |
| Orphan Europe         | 25831.44         | 93,0%        | 15           | 73.3%        |                    |              |              |              |
| Seqirus               |                  |              |              |              | 24263.26           | N/A          | 4            | N/A          |
| Bio Products          | 13636.52         | 12,0%        | 34           | 29.4%        | 8698.44            | 71.3%        | 20           | 95,0%        |
| Martindale            | 14581.65         | 0,0%         | 17           | 0,0%         | 7366.37            | 7.5%         | 7            | 42.9%        |
| Amdipharm Mercury     | 19916.43         | 43.9%        | 30           | 56.7%        |                    |              |              |              |
| Amicus Therapeutics   |                  |              |              |              | 17583.14           | 0,0%         | 16           | 0,0%         |
| CEB Pharma            | 15431.98         | 83.9%        | 62           | 83.9%        |                    |              |              |              |
| Fresenius Med. Care   |                  |              |              |              | 15298.49           | 52.8%        | 10           | 60,0%        |
| Nicovations           | 12331,0          | 0,0%         | 14           | 0,0%         |                    |              |              |              |
| Accretio              | 2460,0           | 67,0%        | 8            | 75,0%        | 8906.71            | 66.7%        | 17           | 70.6%        |
| Mitsubishi Tanabe     | 4988,0           | 60,0%        | 7            | 85.7%        | 5124.2             | N/A          | 13           | N/A          |
| Rosemont Pharmac.     | 5235.17          | 32,0%        | 4            | 75,0%        | 4646.93            | 48.4%        | 5            | 80,0%        |
| Cuxson Gerrard        | 2799.5           | 0,0%         | 9            | 0,0%         | 4369,0             | 0,0%         | 13           | 0,0%         |
| Tesaro                |                  |              |              |              | 6726.51            | 67.8%        | 8            | 62.5%        |
| Augettant             | 1459.51          | N/A          | 1            | N/A          | 4153.47            | N/A          | 5            | N/A          |
| STD Pharmaceuticals   | 600,0            | N/A          | 1            | N/A          |                    |              |              |              |
| Special Products      | 266.2            | N/A          | 2            | N/A          |                    |              |              |              |
| <b>Total</b>          | <b>50,967728</b> | <b>47.9%</b> | <b>54910</b> | <b>55.5%</b> | <b>47,543051.1</b> | <b>59.2%</b> | <b>50241</b> | <b>64.5%</b> |

<sup>a</sup> Companies are listed according to the total value of TOVs in both years

<sup>b</sup> Empty cells mean that company was not in database that year

<sup>c</sup> N/A means company did not provide information on any TOV in aggregate and therefore the consent rate cannot be calculated.
